# Supplementary material for: Development and comparative validation of genomic-driven PCR-based assays to detect Xanthomonas citri pv. citri in citrus plants
Source: PubMed Central journal article supplement (PMC7528614; doi:10.1186/s12866-020-01972-8), 2020-10-01

**clementine****makrut lime**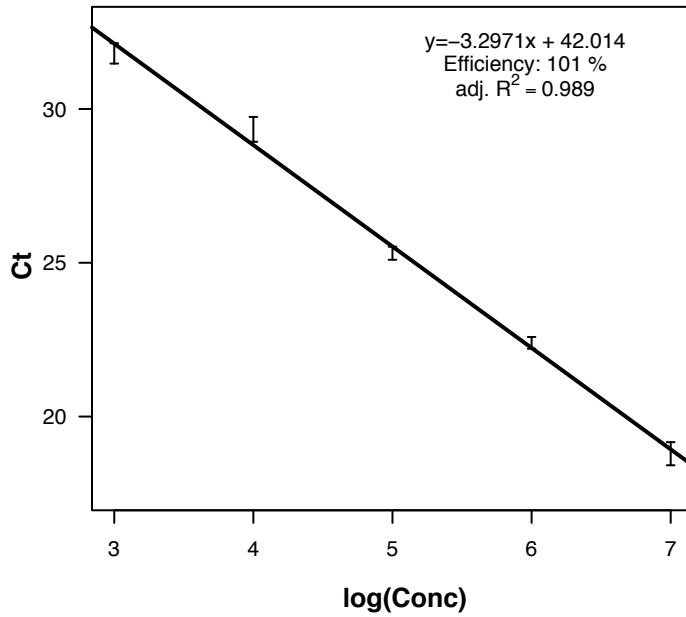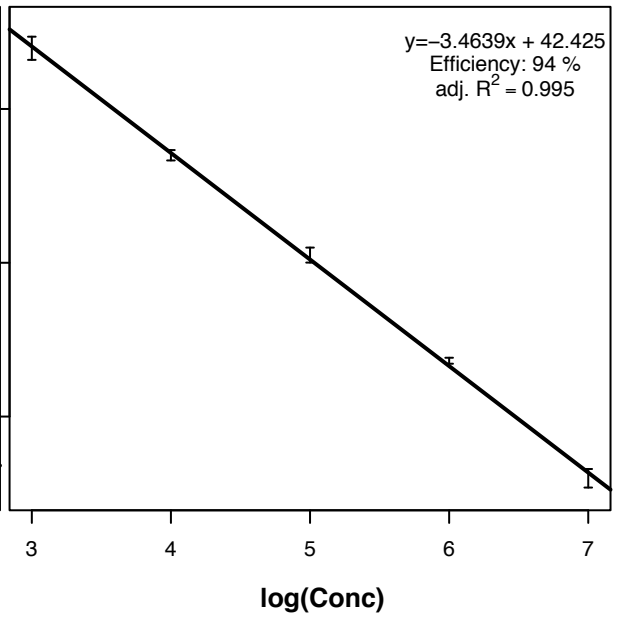**grapefruit****lemon**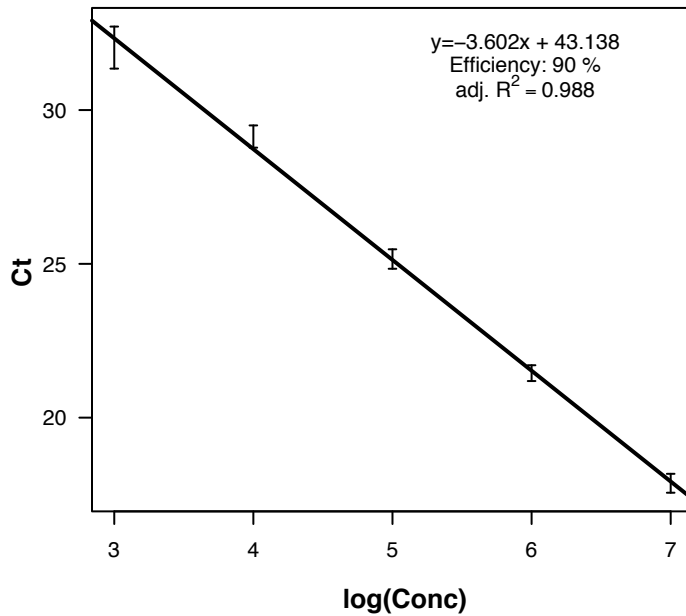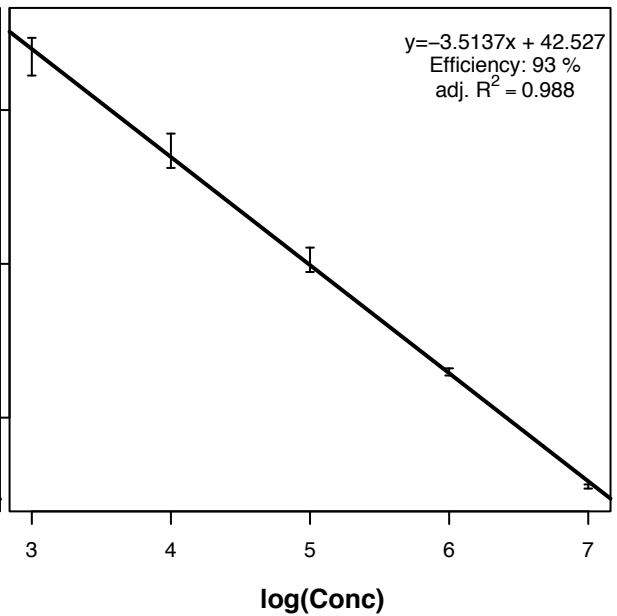

Supplement: 12866_2020_1972_MOESM1_ESM.pdf [file 12866_2020_1972_MOESM1_ESM.pdf]
