# Supplementary material for: Development and comparative validation of genomic-driven PCR-based assays to detect Xanthomonas citri pv. citri in citrus plants
Source: PubMed Central journal article supplement (PMC7528614; doi:10.1186/s12866-020-01972-8), 2020-10-01
Supplement: 12866_2020_1972_MOESM2_ESM.pdf [file 12866_2020_1972_MOESM2_ESM.pdf]

**Table S1. *X. citri* pv. *citri* genes (from strain IAPAR 306, chromosome NC\_003919.1) evaluated by comparative genomics**

| Gene number <sup>a</sup><br>(Start..End) | Hypothetical function                                               | Size<br>(bp) | Number of matching target<br>genomes <sup>b</sup>                            | Matching non-target taxons <sup>c</sup>                                                                                                                                                                                                                                                                                                                               |
|------------------------------------------|---------------------------------------------------------------------|--------------|------------------------------------------------------------------------------|-----------------------------------------------------------------------------------------------------------------------------------------------------------------------------------------------------------------------------------------------------------------------------------------------------------------------------------------------------------------------|
| XAC0147 <sup>d</sup><br>(177709..179226) | RNA-directed DNA<br>polymerase-retron type reverse<br>transcriptase | 1518         | NC                                                                           | NC                                                                                                                                                                                                                                                                                                                                                                    |
| XAC1051<br>(1209505..1210068)            | hypothetical protein                                                | 564          | 91 Xcc genome sequences, 99.82%-<br>100% identity, 100% length               | 100% identity with <i>X. citri</i> pv. <i>cajani</i> on 100%<br>sequence, but sequence divided in two fragments<br>located on two different contigs                                                                                                                                                                                                                   |
| XAC1054<br>(1211424..1212428)            | integrase                                                           | 1005         | NC                                                                           | NC                                                                                                                                                                                                                                                                                                                                                                    |
| XAC 1072<br>(1228276..1228677)           | phage-related DNA-directed<br>RNA polymerase                        | 402          | NC                                                                           | NC                                                                                                                                                                                                                                                                                                                                                                    |
| XAC1923<br>(2248775..2249779)            | hypothetical protein                                                | 1005         | 91 Xcc genome sequences, 99.7%-<br>100% identity, 100% length                | 99.7% identity on 100% sequence for <i>X. citri</i> pv.<br><i>malvacearum</i> , 99.8% identity on 100% sequence for<br><i>X. citri</i> pv. <i>cajani</i>                                                                                                                                                                                                              |
| XAC1926<br>(2250926..2251294)            | hypothetical protein                                                | 369          | 91 Xcc genome sequences, 99.7%-<br>100% identity, 100% length                | 100% identity on 100% sequence for <i>X. citri</i> pv.<br><i>malvacearum</i> , <i>X. citri</i> pv. <i>glycines</i> , <i>X. citri</i> pv.<br><i>cajani</i> , <i>X. citri</i> pv. <i>clitoriae</i> , <i>X. citri</i> pv. <i>leena</i> , <i>X.</i><br><i>citri</i> pv. <i>thespesiae</i> , 99.7% identity on 100%<br>sequence for <i>X. phaseoli</i> pv. <i>phaseoli</i> |
| XAC1927<br>(2251490..2252668)            | Fe-S oxidoreductase                                                 | 1179         | 91 Xcc genome sequences, 99.3%-<br>100% identity, length from 74% to<br>100% | 99.9% identity on 100% sequence for <i>X. citri</i> pv.<br><i>glycines</i> , <i>X. citri</i> pv. <i>cajani</i> , <i>X. citri</i> pv. <i>clitoriae</i> , and<br>99.8% for <i>X. citri</i> pv. <i>leena</i> , <i>X. citri</i> pv. <i>thespesiae</i> ,<br><i>X. phaseoli</i> pv. <i>phaseoli</i> , <i>X. citri</i> pv. <i>punicae</i>                                    |
| XAC1928<br>(2252665..2253498)            | hypothetical protein                                                | 834          | 91 Xcc genome sequences, from<br>99.9%-100% identity, length 100%            | 99%-99.4% identity on 100% sequence with <i>X. citri</i><br>pv. <i>cajani</i> , <i>X. citri</i> pv. <i>glycines</i> , <i>X. phaseoli</i> pv.<br><i>phaseoli</i> , <i>X. citri</i> pv. <i>leena</i> , <i>X. citri</i> pv. <i>thespesiae</i> ,<br><i>X. citri</i> pv. <i>clitoriae</i> , <i>X. citri</i> pv. <i>punicae</i> , <i>X. citri</i> pv.<br><i>malvacearum</i> |

|                               |                      |     |                                                                 |                                                                                                                                                                                                                                                                                                                                                                                                                                                                                                                                          |
|-------------------------------|----------------------|-----|-----------------------------------------------------------------|------------------------------------------------------------------------------------------------------------------------------------------------------------------------------------------------------------------------------------------------------------------------------------------------------------------------------------------------------------------------------------------------------------------------------------------------------------------------------------------------------------------------------------------|
| XAC2178<br>(2549428..2549655) | hypothetical protein | 228 | 91 Xcc genome sequences, 100% identity, length from 98% to 100% | 100% identity with <i>X. citri</i> pv. cajani, 94.7% on 100% sequence with <i>X. arboricola</i> , 94.3%-94.7% identity on 100% sequence with <i>Stenotrophomonas</i> spp., 95.1% identity on 100% sequence with <i>Alcaligenaceae</i> bacterium, and 94.3%-94.7% identity on 100% sequence with <i>Pseudomonas aeruginosa</i>                                                                                                                                                                                                            |
| XAC2509<br>(2937638..2938138) | hypothetical protein | 501 | 91 Xcc genome sequences, 100% identity, 100% length             | 100% identity on 100% sequence with <i>X. citri</i> pv. cajani, 97.6% identity on 100% sequence with <i>X. euvesicatoria</i> pv. citrumelonis                                                                                                                                                                                                                                                                                                                                                                                            |
| XAC2538<br>(2990993..2991265) | hypothetical protein | 273 | 91 Xcc genome sequences, 99.8%-100% identity, 100% length       | 100% identity on 100% sequence with <i>X. citri</i> pv. glycines, 99.5%-99.6% identity on 100% sequence with <i>X. citri</i> [ex <i>Pseudomonas cissicola</i> ], <i>X. citri</i> pv. vitiswoodrowii, <i>X. citri</i> pv. khayae, <i>X. phaseoli</i> pv. phaseoli, <i>X. citri</i> pv. punicae, <i>X. citri</i> pv. viticola, 98.6% identity on 100% sequence with <i>X. citri</i> pv. bilvae, 99% identity on 97% sequence with <i>X. citri</i> pv. aurantifolii                                                                         |
| XAC4266<br>(5034781..5035413) | hypothetical protein | 633 | 91 Xcc genome sequences, 99.8%-100% identity, 100% length       | 99.5% identity on 100% sequence with <i>X. citri</i> pv. cajani, <i>X. citri</i> pv. clitoriae, 99.4% identity on 100% sequence with <i>X. citri</i> pv. leeana, <i>X. citri</i> pv. thespesiae, <i>X. phaseoli</i> pv. phaseoli, <i>X. citri</i> pv. malvacearum, <i>X. citri</i> pv. khayae, <i>X. citri</i> pv. vitiscarnosae, <i>X. citri</i> pv. martyniicola                                                                                                                                                                       |
| XAC4338<br>(5133650..5134021) | hypothetical protein | 372 | 91 Xcc genome sequences, 100%-99.7% identity, 100% length       | 99.2% identity on 100% sequence with <i>X. citri</i> pv. mangiferaeindicae, <i>X. citri</i> pv. cajani, <i>X. axonopodis</i> pv. melhusii, <i>X. citri</i> pv. centellae, 98.9% identity on 100% sequence with <i>X. citri</i> pv. glycines                                                                                                                                                                                                                                                                                              |
| XANAC 0046<br>(46241..46828)  | penicillin acylase   | 588 | 91 Xcc genome sequences, 100% identity, 100% length             | 99.8% identity on 100% sequence with <i>X. citri</i> pv. malvacearum, <i>X. citri</i> pv. leeana, <i>X. citri</i> pv. thespesiae, 99.6% identity on 100% sequence with <i>X. citri</i> pv. viticola, <i>X. axonopodis</i> pv. bauhiniae, <i>X. citri</i> pv. cajani, <i>X. citri</i> pv. vitistrifoliae, 99.5% identity on 100% sequence with <i>X. citri</i> pv. clitoriae, <i>X. citri</i> pv. vitiscarnosae, 99.3% identity on 100% sequence with <i>X. citri</i> [ex <i>Pseudomonas cissicola</i> ] and <i>X. citri</i> pv. glycines |

|                                   |                                      |     |                                                         |                                                                                                                                                                                                                                                                                                                                     |
|-----------------------------------|--------------------------------------|-----|---------------------------------------------------------|-------------------------------------------------------------------------------------------------------------------------------------------------------------------------------------------------------------------------------------------------------------------------------------------------------------------------------------|
| XANAC_0185<br>(185484..185705)    | protein of unknown function          | 222 | 91 Xcc genome sequences, 100% identity, 100% length     | 100% identity on 100% sequence with <i>X. citri</i> pv. cajani, 99.5% identity on 100% sequence with <i>X. citri</i> pv. viticola, <i>X. citri</i> pv. khayae, <i>X. citri</i> pv. vitiscarnosae, <i>X. citri</i> pv. leana, <i>X. citri</i> pv. martyniicola, <i>X. citri</i> pv. thespesiae, <i>X. euvesicatoria</i> pv. alfalfae |
| XANAC_0841<br>(850534..850740)    | protein of unknown function          | 207 | 91 Xcc genome sequences, 100% identity, 100% length     | 100% identity on 100% sequence with <i>X. citri</i> pv. mangiferaeindicae, <i>X. citri</i> pv. melhusii and <i>X. citri</i> pv. centellae, 99.5% on 100% sequence with <i>X. citri</i> pv. glycines                                                                                                                                 |
| XANAC_1218<br>(1213143..1213316)  | protein of unknown function          | 174 | 91 Xcc genome sequences, 100% identity, 100% length     | 100% identity on 100% sequence with <i>X. citri</i> pv. cajani, 97.1% identity on 100% sequence with <i>X. citri</i> pv. glycines                                                                                                                                                                                                   |
| XANAC_1219<br>(1213268..1213465)  | protein of unknown function          | 198 | 91 Xcc genome sequences, 100% identity, 100% length     | 100% identity on 100% sequence with <i>X. citri</i> pv. cajani, 97.5% identity on 100% sequence with <i>X. citri</i> pv. glycines                                                                                                                                                                                                   |
| XANAC_1231<br>(1219270..1219530)  | exported protein of unknown function | 261 | 91 Xcc genome sequences, 100% identity, 100% length     | 99.6% identity with <i>X. citri</i> pv. cajani on 100% length                                                                                                                                                                                                                                                                       |
| XANAC_3035<br>(3073163..3073249)  | DUF4189 domain-containing protein    | 87  | NC                                                      | NC                                                                                                                                                                                                                                                                                                                                  |
| XANAC_3193<br>(3204097..3204279)  | protein of unknown function          | 183 | 91 Xcc genome sequences, 100% identity, 99%-100% length | 99.4% identity on 100% length with <i>X. citri</i> pv. vitistrifoliae, 98.9% identity on 100% length with <i>X. citri</i> pv. glycines, <i>X. citri</i> pv. viticola, <i>X. citri</i> pv. cajani, <i>X. citri</i> pv. vitiscarnosae, <i>X. citri</i> pv. clitoriae, <i>X. citri</i> pv. martyniicola                                |
| XANAC_3524<br>(3545117.. 3545419) | protein of unknown function          | 303 | 91 Xcc genome sequences, 100% identity, 100% length     | 100% identity on 100% length with <i>X. citri</i> pv. cajani, 99.3% identity on 100% length with <i>X. citri</i> pv. clitoriae, 99% identity on 100% length with <i>X. citri</i> pv. bauhinae, 98.7% identity on 100% length with <i>X. citri</i> pv. punicae, <i>X. citri</i> pv. glycines, <i>X. citri</i> pv. azadirachtae       |
| XANAC_3628<br>(3676698..3676772)  | protein of unknown function          | 75  | NC                                                      | NC                                                                                                                                                                                                                                                                                                                                  |

|                                  |                             |     |                                                           |                                                                                                                                                                                                                                                                                                     |
|----------------------------------|-----------------------------|-----|-----------------------------------------------------------|-----------------------------------------------------------------------------------------------------------------------------------------------------------------------------------------------------------------------------------------------------------------------------------------------------|
| XANAC_3637<br>(3682156..3682323) | protein of unknown function | 168 | 91 Xcc genome sequences, 100% identity, 100% length       | 100% identity on 100% length with <i>X. citri</i> pv. cajani, <i>X. citri</i> pv. glycines, <i>X. citri</i> pv. mangiferaeindicae, <i>X. citri</i> pv. bauhiniae, <i>X. citri</i> pv. vitiswoodrowii, <i>X. citri</i> pv. clitoriae, <i>X. citri</i> pv. centellae, <i>X. phaseoli</i> pv. phaseoli |
| XANAC_4546<br>(4613012..4613179) | protein of unknown function | 168 | 91 Xcc genome sequences, 100% identity, 100% length       | 100% identity on 100% length with <i>X. citri</i> pv. cajani, 99.4% identity on 100% length with <i>X. citri</i> pv. clitoriae, 98.2% identity on 100% length with <i>X. citri</i> pv. vitiswoodrowii, 98.2% identity on 100% length with <i>X. citri</i> pv. khayae                                |
| XANAC_4715<br>(4764518..4764655) | protein of unknown function | 138 | 91 Xcc genome sequences, 100% identity, 100% length       | 100% identity on 100% length with <i>X. citri</i> pv. cajani, 99.4% identity on 100% length with <i>X. citri</i> pv. clitoriae, 98.2% identity on 100% length with <i>X. citri</i> pv. vitiswoodrowii, 98.2% identity on 100% length with <i>X. citri</i> pv. khayae                                |
| XANAC_4813<br>(4882225..4882428) | protein of unknown function | 204 | 91 Xcc genome sequences, 99.5%-100% identity, 100% length | 100% identity on 100% length with <i>X. citri</i> pv. clitoriae, 99.5% identity on 100% length with <i>X. citri</i> pv. mangiferaeindicae, <i>X. citri</i> pv. bauhiniae, <i>X. citri</i> pv. khayae, <i>X. citri</i> pv. centellae                                                                 |
| XANAC_5008<br>(5100670..5100870) | protein of unknown function | 201 | 91 Xcc genome sequences, 99.5%-100% identity, 100% length | 99.5% identity on 100% length with <i>X. citri</i> pv. glycines, <i>X. phaseoli</i> pv. phaseoli, 99% identity on 100% length with <i>X. citri</i> pv. melhusii, <i>X. citri</i> pv. punicae                                                                                                        |
| XANAC_2436<br>(2458672..2458872) | protein of unknown function | 201 | 91 Xcc genome sequences, 99.5%-100% identity, 100% length | 100% identity on 100% length with <i>X. perforans</i> , <i>X. citri</i> pv. viticola, <i>X. citri</i> pv. vitistrifoliae, <i>X. phaseoli</i> pv. phaseoli, 99.5% identity on 100% length with <i>X. euvesicatoria</i>                                                                               |
| XANAC_1716<br>(1723635..1724015) | protein of unknown function | 381 | 91 Xcc genome sequences, 99.5%-100% identity, 100% length | 100% identity on 100% length with <i>X. citri</i> pv. centellae, <i>X. citri</i> pv. mangiferaeindicae, 99.7% identity on 100% length with <i>X. citri</i> pv. vitistrifoliae, <i>X. citri</i> pv. melhusii                                                                                         |
| XAC2177<br>(2549611..2549979)    | hypothetical protein        | 369 | 91 Xcc genome sequences, 100% identity, 90%-100% length   | 100% identity on 100% length with <i>X. citri</i> pv. cajani, 96.72% identity on 100% length with <i>X. arboricola</i> , 93.6%-92.8% identity on 100% length with <i>Stenotrophomonas maltophilia</i>                                                                                               |

|                            |                       |      |    |    |
|----------------------------|-----------------------|------|----|----|
| XACa0021<br>(11493..12713) | replication protein A | 1221 | NC | NC |
| XACb0016<br>(18214..19434) | replication protein A | 1221 | NC | NC |

---

NC: not considered – see text for details.

<sup>a</sup> Name of predicted CDSs given by AMIGene (Annotation of Microbial Genes) tool of the MicroScope platform. The CDSs were classified into two categories, Common (XAC) or UNIQUE\_AMIGA (XANAC), these last CDCs coding often for proteins of unknown function or having a low probability of coding for functional proteins.

<sup>b</sup> number of matching target genomes on 91 genome sequences of *X. citri* pv. *citri* available on NCBI (complete and draft genomes), including the genome of *X. campestris* pv. *durantae* reclassified as *X. citri* pv. *citri* : CP023662.1, CP023661.1, CP023285.1, CP020885.1, CP018858.1, CP018854.1, CP018850.1, CP018847.1, CP011827.2, CP008989.1, CP008995.1, CP009010.1, CP009013.1, CP009016.1, CP009022.1, CP008992.1, CP008998.1, CP009001.1, CP009004.1, CP009007.1, CP009019.1, CP009025.1, CP009028.1, CP006857.1, AE008923.1, CP020889.1, CP020882.1, CP009031.1, CP009034.1, CP009037.1, CP009040.1, CP003778.1, CP004399.1, MSQW01000001.1, MSQV01000001.1, LOKP01000122.1, LJGA01000001.1, LAUQ01000080.1, LAUP01000022.1, LAUN01000076.1, LAUG01000008.1, LAUF01000054.1, LAUE01000081.1, JRON01000085.1, JPYD01000355.1, CDMS01000294.1, CDMR01000279.1, CDMQ01000426.1, CDMO01000247.1, CDHD01000506.1, CDHC01000506.1, CDDV01000200.1, CDBA01000286.1, CDAX01000288.1, CDAV01000249.1, CDAT01000412.1, CDAS01000362.1, CDAQ01000377.1, CDAO01000405.1, CDAN01000306.1, CDAM01000677.1, CDAL01000823.1, CDAK01000289.1, CDAI01000120.1, CCXZ01000068.1, CCWY01000047.1, CCWX01000082.1, CCWK01000137.1, CCWJ01000067.1, CCWI01000065.1, CCWH01000089.1, CCWE01000066.1, CCWD01000068.1, CCWC01000056.1, CCWB01000074.1, CCWA01000113.1, CCVZ01000038.1, CCVY01000038.1, CCVX01000063.1, JPLP01000001.1, JPLO01000001.1, JPLN01000001.1, CDAY01000290.1, CDAW01000309.1, CDAU01000298.1, CDAP01000701.1, CDAJ01000134.1, CCWV01000180.1, CCWL01000073.1, CCWG01000142.1, CCWF01000115.1.

<sup>c</sup> These summarized the best hits obtained with BLASTn and Megablast searches against NCBI databases (nr, draft and complete genomes, complete plasmids, complete bacteriophages). *Xanthomonas* names according to Parkinson et al. (2009). Int. J. Syst. Evol. Microbiol. 59:264-274.

<sup>d</sup> This set of genes was obtained by testing 30 *Xcc* genomes against 30 non-target genomes using the MicroScope platform (Genoscope, France), and the tool “gene phyloprofile” in “comparative genomics”.

**Table S2. Detection of *X. citri* pv. *citri* from field samples by XAC1051-2qPCR, XAC1051-PCR and isolation on KC semi-selective agar medium**

| Sample  | citrus (cultivar)         | qPCR results |       |                                  | Plating results<br>conc.<br>(CFU ml <sup>-1</sup> ) | PCR<br>results |
|---------|---------------------------|--------------|-------|----------------------------------|-----------------------------------------------------|----------------|
|         |                           | Ct1          | Ct2   | conc.<br>(CFU ml <sup>-1</sup> ) |                                                     |                |
| CG 1-1  | <i>C. x aurantiifolia</i> | 19.82        | 19.50 | 5.67 x 10 <sup>6</sup>           | 1.57 x 10 <sup>6</sup>                              | +              |
| CG 1-2  | <i>C. x aurantiifolia</i> | 19.00        | 19.09 | 8.55 x 10 <sup>6</sup>           | 2.04 x 10 <sup>6</sup>                              | +              |
| CG 1-3  | <i>C. x aurantiifolia</i> | 19.95        | 19.83 | 4.81 x 10 <sup>6</sup>           | 2.33 x 10 <sup>6</sup>                              | +              |
| CG 2-1  | <i>C. x aurantiifolia</i> | 22.23        | 22.14 | 1.02 x 10 <sup>6</sup>           | 1.04 x 10 <sup>6</sup>                              | +              |
| CG 2-2  | <i>C. x aurantiifolia</i> | 22.57        | 22.51 | 8.03 x 10 <sup>5</sup>           | 1.56 x 10 <sup>6</sup>                              | +              |
| CG 2-3  | <i>C. x aurantiifolia</i> | 21.84        | 21.78 | 1.32 x 10 <sup>6</sup>           | 1.30 x 10 <sup>6</sup>                              | +              |
| CG 3-1  | <i>C. x aurantiifolia</i> | 24.37        | 24.24 | 2.44 x 10 <sup>5</sup>           | 7.30 x 10 <sup>5</sup>                              | +              |
| CG 3-2  | <i>C. x aurantiifolia</i> | 23.96        | 23.91 | 3.12 x 10 <sup>5</sup>           | 3.00 x 10 <sup>6</sup>                              | +              |
| CG 3-3  | <i>C. x aurantiifolia</i> | 24.40        | 24.08 | 2.56 x 10 <sup>5</sup>           | 3.53 x 10 <sup>6</sup>                              | +              |
| CG 4-1  | <i>C. x aurantiifolia</i> | 20.15        | 19.93 | 4.36 x 10 <sup>6</sup>           | 1.76 x 10 <sup>6</sup>                              | +              |
| CG 4-2  | <i>C. x aurantiifolia</i> | 20.28        | 20.33 | 3.63 x 10 <sup>6</sup>           | 1.81 x 10 <sup>6</sup>                              | +              |
| CG 4-3  | <i>C. x aurantiifolia</i> | 20.51        | 20.47 | 3.21 x 10 <sup>6</sup>           | 2.42 x 10 <sup>6</sup>                              | +              |
| OTN 1-1 | <i>C. x sinensis</i>      | 20.76        | 20.22 | 3.53 x 10 <sup>6</sup>           | 1.25 x 10 <sup>6</sup>                              | +              |
| OTN 1-2 | <i>C. x sinensis</i>      | 20.15        | 19.97 | 4.67 x 10 <sup>6</sup>           | 1.55 x 10 <sup>6</sup>                              | +              |
| OTN 1-3 | <i>C. x sinensis</i>      | 20.31        | 20.34 | 3.88 x 10 <sup>6</sup>           | 4.94 x 10 <sup>6</sup>                              | +              |
| OTN 2-1 | <i>C. x sinensis</i>      | 18.53        | 18.40 | 1.39 x 10 <sup>7</sup>           | 2.03 x 10 <sup>6</sup>                              | +              |
| OTN 2-2 | <i>C. x sinensis</i>      | 18.41        | 18.35 | 1.48 x 10 <sup>7</sup>           | 2.24 x 10 <sup>6</sup>                              | +              |
| OTN 2-3 | <i>C. x sinensis</i>      | 17.95        | 17.95 | 1.98 x 10 <sup>7</sup>           | 2.04 x 10 <sup>6</sup>                              | +              |

|          |                                                |       |       |                    |                    |   |
|----------|------------------------------------------------|-------|-------|--------------------|--------------------|---|
| OTN 3-1  | <i>C. x sinensis</i>                           | 21.33 | 21.31 | $1.96 \times 10^6$ | $8.06 \times 10^5$ | + |
| OTN 3-2  | <i>C. x sinensis</i>                           | 21.12 | 21.30 | $2.12 \times 10^6$ | $6.94 \times 10^5$ | + |
| OTNT 3-3 | <i>C. x sinensis</i>                           | 20.64 | 20.49 | $3.30 \times 10^6$ | $6.78 \times 10^5$ | + |
| OTN 4-1  | <i>C. x sinensis</i>                           | 16.21 | 15.86 | $7.42 \times 10^7$ | $3.86 \times 10^6$ | + |
| OTN 4-2  | <i>C. x sinensis</i>                           | 16.46 | 16.31 | $5.81 \times 10^7$ | $3.60 \times 10^6$ | + |
| OTN 4-3  | <i>C. x sinensis</i>                           | 15.90 | 15.82 | $8.29 \times 10^7$ | $1.81 \times 10^6$ | + |
| MT 1-1   | <i>C. reticulata</i>                           | 19.04 | 19.02 | $9.45 \times 10^6$ | $9.90 \times 10^6$ | + |
| MT 1-2   | <i>C. reticulata</i>                           | 18.86 | 18.65 | $1.15 \times 10^7$ | $7.72 \times 10^5$ | + |
| MT 1-3   | <i>C. reticulata</i><br>(Temple)               | 19.05 | 18.87 | $9.95 \times 10^6$ | $3.76 \times 10^6$ | + |
| MT 2-1   | <i>C. reticulata</i>                           | 20.63 | 20.87 | $2.92 \times 10^6$ | $3.19 \times 10^5$ | + |
| MT 2-2   | <i>C. reticulata</i>                           | 21.23 | 22.25 | $1.56 \times 10^6$ | $2.83 \times 10^5$ | + |
| MT 2-3   | <i>C. reticulata</i>                           | 20.71 | 20.75 | $2.95 \times 10^6$ | $2.79 \times 10^6$ | + |
| MT 3-1   | <i>C. reticulata</i>                           | 17.71 | 17.85 | $2.22 \times 10^7$ | $6.83 \times 10^5$ | + |
| MT 3-2   | <i>C. reticulata</i>                           | 18.07 | 18.05 | $1.84 \times 10^7$ | $7.00 \times 10^5$ | + |
| MT 3-3   | <i>C. reticulata</i>                           | 18.17 | 17.83 | $1.93 \times 10^7$ | $5.69 \times 10^5$ | + |
| T 1-1    | <i>C. reticulata</i> X<br><i>C. x sinensis</i> | 17.87 | 17.86 | $2.10 \times 10^7$ | $2.36 \times 10^6$ | + |
| T 1-2    | <i>C. reticulata</i> X<br><i>C. x sinensis</i> | 18.17 | 17.96 | $1.83 \times 10^7$ | $2.27 \times 10^6$ | + |
| T 1-3    | <i>C. reticulata</i> X<br><i>C. x sinensis</i> | 17.96 | 17.9  | $2.13 \times 10^7$ | $2.14 \times 10^6$ | + |
| T 2-1    | <i>C. reticulata</i> X<br><i>C. x sinensis</i> | 17.79 | 20.64 | $3.25 \times 10^6$ | $3.19 \times 10^5$ | + |
| T 2-2    | <i>C. reticulata</i> X<br><i>C. x sinensis</i> | 20.49 | 20.29 | $3.72 \times 10^6$ | $3.06 \times 10^5$ | + |
| T 2-3    | <i>C. reticulata</i> X<br><i>C. x sinensis</i> | 20.78 | 21.15 | $2.53 \times 10^6$ | $3.94 \times 10^5$ | + |
| TA-1     | <i>C. reticulata</i> X<br><i>C. x sinensis</i> | 14.85 | 14.86 | $1.64 \times 10^8$ | $4.30 \times 10^7$ | + |

|      |                                                |       |       |                        |                        |   |
|------|------------------------------------------------|-------|-------|------------------------|------------------------|---|
| TA-2 | <i>C. reticulata</i> X<br><i>C. x sinensis</i> | 14.8  | 14.85 | 1.67 x 10 <sup>8</sup> | 5.59 x 10 <sup>7</sup> | + |
| TA-3 | <i>C. reticulata</i> X<br><i>C. x sinensis</i> | 14.66 | 14.84 | 1.76 x 10 <sup>8</sup> | 9.37 x 10 <sup>7</sup> | + |
| TA-4 | <i>C. reticulata</i> X<br><i>C. x sinensis</i> | 16.01 | 15.97 | 7.38 x 10 <sup>7</sup> | 6.39 x 10 <sup>7</sup> | + |
| TA-5 | <i>C. reticulata</i> X<br><i>C. x sinensis</i> | 14.71 | 14.77 | 1.77 x 10 <sup>8</sup> | 1.31 x 10 <sup>8</sup> | + |
| TA-6 | <i>C. reticulata</i> X<br><i>C. x sinensis</i> | 15.08 | 15.48 | 1.21 x 10 <sup>8</sup> | 1.07 x 10 <sup>8</sup> | + |

---



**Table S3. Herbarium samples, XAC1051-qPCR and NGS results**

| Reference  | Herbarium                    | Host                | Origin      | Year | DNA quantity<br>(ng per mg of leaf) | DNA fragment<br>length<br>Mean [sd] (bp) | Xac1051-qPCR (Ct) | NGS*    |
|------------|------------------------------|---------------------|-------------|------|-------------------------------------|------------------------------------------|-------------------|---------|
| P05297996  | MNHN Paris                   | <i>Citrus</i> sp.   | Philippines | 1911 | 0,82                                | 70 [19]                                  | + (31.1)          | + (1.6) |
| P05297992  | MNHN Paris                   | <i>C. x limetta</i> | Philippines | 1915 | 0,75                                | 75 [22]                                  | + (33.6)          | + (8.5) |
| MAU0015160 | Royal Mauritius<br>Herbarium | <i>Citrus</i> sp.   | Rodrigues   | 1992 | 1,12                                | 90 [29]                                  | + (23.5)          | + (3.4) |

\* % of total reads mapping to *Xanthomonas citri* pv. *citri* reference genome (strain IAPAR 306, chromosome NC\_003919.1).

**Table S4. Analytical specificity of different conventional and real-time quantitative PCR assays determined from suspensions of *Xanthomonas* spp. pathogenic to citrus and non-target *Xanthomonas* strains**

| Strain        | Taxon                     | Pathot<br>ype | Host                                           | Origin       | PCR     |           |            |       |                                 | Real-time quantitative PCR                |                       |                     |
|---------------|---------------------------|---------------|------------------------------------------------|--------------|---------|-----------|------------|-------|---------------------------------|-------------------------------------------|-----------------------|---------------------|
|               |                           |               |                                                |              | Jpth1/2 | VM3/<br>4 | XAC<br>F/R | XCF/R | XAC1051-<br>F/R (this<br>study) | XAC-<br>1051-<br>dqPCR<br>(this<br>study) | J-<br>Taqpht-<br>qPCR | VM-<br>Syb-<br>qPCR |
| <b>Target</b> |                           |               |                                                |              |         |           |            |       |                                 |                                           |                       |                     |
| CFBP 5234     | <i>X. citri</i> pv. citri | A             | <i>C. x limon</i>                              | Argentina    | +       | +         | +          | +     | +                               | +(31.63)                                  | +(26.58)              | +(32.56)            |
| JJ155         | <i>X. citri</i> pv. citri | A             | <i>C. x aurantiifolia</i>                      | Argentina    | +       | +         | +          | +     | +                               | +(31.03)                                  | +(28.76)              | +(28.40)            |
| LMG 9668      | <i>X. citri</i> pv. citri | A             | <i>C. x aurantiifolia</i>                      | Australia    | +       | +         | +          | +     | +                               | +(31.24)                                  | +(31.17)              | ND                  |
| LMG 9672      | <i>X. citri</i> pv. citri | A             | <i>C. x aurantiifolia</i>                      | Australia    | +       | +         | +          | +     | +                               | +(29.56)                                  | +(28.38)              | +(31.89)            |
| LG097         | <i>X. citri</i> pv. citri | A             | <i>C. x limon</i>                              | Bangladesh   | +       | +         | +          | +     | +                               | +(33.35)                                  | +(31.41)              | +(30.67)            |
| LG101         | <i>X. citri</i> pv. citri | A             | <i>C. x aurantiifolia</i>                      | Bangladesh   | +       | +         | +          | +     | +                               | +(28.99)                                  | +(27.25)              | +(29.07)            |
| LG102         | <i>X. citri</i> pv. citri | A             | <i>Citrus</i> sp.                              | Bangladesh   | +       | +         | +          | +     | +                               | +(30.05)                                  | +(22.91)              | +(25.60)            |
| LG114         | <i>X. citri</i> pv. citri | A             | <i>C. x aurantiifolia</i>                      | Bangladesh   | +       | +         | +          | +     | +                               | +(29.22)                                  | +(27.87)              | +(26.32)            |
| LG117         | <i>X. citri</i> pv. citri | A             | <i>C. x aurantiifolia</i>                      | Bangladesh   | +       | +         | +          | +     | +                               | +(33.29)                                  | +(26.06)              | +(28.87)            |
| CFBP 2861     | <i>X. citri</i> pv. citri | A             | <i>C. x latifolia</i>                          | Brazil       | +       | +         | +          | +     | +                               | +(28.89)                                  | +(30.07)              | +(26.68)            |
| CFBP 2865     | <i>X. citri</i> pv. citri | A             | <i>C. x aurantiifolia</i>                      | Brazil       | +       | +         | +          | +     | +                               | +(28.89)                                  | +(31.03)              | +(27.00)            |
| CFBP 2908     | <i>X. citri</i> pv. citri | A             | <i>C. reticulata</i>                           | Brazil       | +       | +         | +          | +     | +                               | +(31.59)                                  | +(32.00)              | +(29.50)            |
| LG130         | <i>X. citri</i> pv. citri | A             | <i>Citrus</i> sp.                              | Brazil       | +       | +         | +          | +     | +                               | +(33.16)                                  | +(30.66)              | +(29.66)            |
| LJ303-01      | <i>X. citri</i> pv. citri | A             | <i>C. reticulata</i> X<br><i>C. x sinensis</i> | Burkina Faso | +       | +         | +          | +     | +                               | +(28.46)                                  | +(26.34)              | +(29.60)            |
| LK004-2       | <i>X. citri</i> pv. citri | A             | <i>C. x paradisi</i>                           | Burkina Faso | +       | +         | +          | +     | +                               | +(30.20)                                  | +(27.86)              | +(31.49)            |
| LK004-4       | <i>X. citri</i> pv. citri | A             | <i>C. x sinensis</i>                           | Burkina Faso | +       | +         | +          | +     | +                               | +(33.56)                                  | +(30.60)              | +(33.46)            |
| LD071B        | <i>X. citri</i> pv. citri | A             | <i>Citrus</i> sp.                              | Cambodia     | +       | +         | +          | +     | +                               | +(28.87)                                  | +(32.84)              | +(29.59)            |
| JH081-2       | <i>X. citri</i> pv. citri | A             | <i>Citrus</i> sp.                              | China        | +       | +         | +          | +     | +                               | +(32.95)                                  | +(30.09)              | +(30.5)             |
| JJ035         | <i>X. citri</i> pv. citri | A             | <i>C. reticulata</i>                           | China        | +       | +         | +          | +     | +                               | +(33.14)                                  | +(31.10)              | +(30.51)            |

|                         |                           |   |                                                |                   |   |   |   |   |   |          |          |          |
|-------------------------|---------------------------|---|------------------------------------------------|-------------------|---|---|---|---|---|----------|----------|----------|
| CFBP 2857               | <i>X. citri</i> pv. citri | A | <i>C. x aurantiifolia</i>                      | Fiji              | + | + | + | + | + | +(32.67) | +(29.9)  | +(30.21) |
| LL052                   | <i>X. citri</i> pv. citri | A | <i>C. x sinensis</i>                           | Grande Comore Is. | + | + | + | + | + | +(28.68) | +(29.27) | +(29.47) |
| JJ186-2                 | <i>X. citri</i> pv. citri | A | <i>Citrus</i> sp.                              | Guam              | + | + | + | + | + | +(33.75) | +(30.97) | +(31.09) |
| NCPFB 1471              | <i>X. citri</i> pv. citri | A | <i>C. maxima</i>                               | Hong Kong         | + | + | + | + | + | +(28.98) | +(29.2)  | +(29.51) |
| JJ165                   | <i>X. citri</i> pv. citri | A | <i>C. maxima</i>                               | India             | + | + | + | + | + | +(30.61) | +(29.11) | +(30.68) |
| NCPFB 211               | <i>X. citri</i> pv. citri | A | <i>Citrus</i> sp.                              | India             | + | + | + | + | + | +(28.85) | -        | +(30.74) |
| NCPFB 3610              | <i>X. citri</i> pv. citri | A | <i>Poncirus trifoliata</i>                     | India             | + | + | + | + | + | +(28.38) | +(25.92) | +(26.07) |
| LD108-1                 | <i>X. citri</i> pv. citri | A | <i>Citrus</i> sp.                              | Indonesia         | + | + | + | + | + | +(32.12) | +(24.5)  | +(28.90) |
| JJ163                   | <i>X. citri</i> pv. citri | A | <i>C. reticulata</i>                           | Japan             | + | + | + | + | + | +(33.79) | +(29.05) | +(30.08) |
| JJ037-2                 | <i>X. citri</i> pv. citri | A | <i>C. medica</i> X<br><i>C. hystrix</i>        | Malaysia          | + | + | + | + | + | +(26.31) | +(30.29) | +(26.00) |
| JJ238-8                 | <i>X. citri</i> pv. citri | A | <i>C. x aurantiifolia</i>                      | Maldives Is.      | + | + | + | + | + | +(31.93) | +(30.69) | +(32.44) |
| LE097-2                 | <i>X. citri</i> pv. citri | A | <i>C. x volkameriana</i>                       | Mali              | + | + | + | + | + | +(29.62) | +(27.47) | +(25.30) |
| LE103-1                 | <i>X. citri</i> pv. citri | A | <i>C. reticulata</i> X<br><i>C. x paradisi</i> | Mali              | + | + | + | + | + | +(29.78) | +(19.68) | +(25.90) |
| LE121-2                 | <i>X. citri</i> pv. citri | A | <i>C. x macrophylla</i>                        | Mali              | + | + | + | + | + | +(32.13) | +(30.77) | +(29.46) |
| LH070-2                 | <i>X. citri</i> pv. citri | A | <i>C. aurantiifolia</i>                        | Mali              | + | + | + | + | + | +(29.46) | +(28.14) | +(30.85) |
| LL077-7                 | <i>X. citri</i> pv. citri | A | <i>C. x latifolia</i>                          | Martinique Is.    | + | + | + | + | + | +(30.10) | +(28.54) | +(29.76) |
| JK165                   | <i>X. citri</i> pv. citri | A | <i>C. x aurantium</i>                          | Mauritius Is.     | + | + | + | + | + | +(32.19) | +(30.18) | +(29.94) |
| LJ228-1                 | <i>X. citri</i> pv. citri | A | <i>C. hystrix</i>                              | Mayotte Is.       | + | + | + | + | + | +(28.04) | +(25.66) | +(28.92) |
| LD072-2                 | <i>X. citri</i> pv. citri | A | <i>Citrus</i> sp.                              | Myanmar           | + | + | + | + | + | +(32.45) | +(29.84) | +(29.59) |
| CFBP 2525 <sup>PT</sup> | <i>X. citri</i> pv. citri | A | <i>C. x aurantiifolia</i>                      | New Zealand       | + | + | + | + | + | +(32.06) | +(30.29) | +(29.63) |
| JF090-12                | <i>X. citri</i> pv. citri | A | <i>C. x aurantiifolia</i>                      | Oman              | + | + | + | + | + | +(34.19) | +(31.51) | +(31.86) |
| JJ238-16                | <i>X. citri</i> pv. citri | A | <i>C. x sinensis</i>                           | Pakistan          | + | + | + | + | + | +(33.39) | +(27.99) | +(31.18) |
| LH001-1                 | <i>X. citri</i> pv. citri | A | <i>Citrus</i> sp.                              | Pakistan          | + | + | + | + | + | +(32.96) | +(33.27) | +(30.38) |
| LE085-1                 | <i>X. citri</i> pv. citri | A | <i>C. x limon</i>                              | Papua New Guinea  | + | + | + | + | + | +(33.57) | +(29.58) | +(30.97) |
| JK148-10                | <i>X. citri</i> pv. citri | A | <i>C. x madurensis</i>                         | Philippines       | + | + | + | + | + | +(29.63) | +(26.71) | +(26.35) |

|                       |                           |    |                                                |                      |   |   |   |   |   |          |          |          |
|-----------------------|---------------------------|----|------------------------------------------------|----------------------|---|---|---|---|---|----------|----------|----------|
| C21                   | <i>X. citri</i> pv. citri | A  | <i>C. x sinensis</i>                           | Reunion Is.          | + | + | + | + | + | +(30.54) | +(28.30) | +(29.19) |
| LH262                 | <i>X. citri</i> pv. citri | A  | <i>C. reticulata</i> X<br><i>C. x sinensis</i> | Reunion Is.          | + | + | + | + | + | +(30.45) | +(28.71) | +(32.40) |
| JJ010-7               | <i>X. citri</i> pv. citri | A  | <i>Citrus</i> sp.                              | Rodrigues Is.        | + | + | + | + | + | +(31.12) | +(32.63) | +(32.09) |
| LH036-2               | <i>X. citri</i> pv. citri | A  | <i>C. x paradisi</i>                           | Senegal              | + | + | + | + | + | +(29.04) | +(28.53) | +(30.40) |
| LJ002-2               | <i>X. citri</i> pv. citri | A  | <i>C. x sinensis</i>                           | Seychelles           | + | + | + | + | + | +(31.42) | +(29.99) | +(34.79) |
| JK004-3               | <i>X. citri</i> pv. citri | A  | <i>C. reticulata</i> x<br><i>C. x sinensis</i> | South Korea          | + | + | + | + | + | +(32.05) | +(30.06) | +(29.43) |
| LB234                 | <i>X. citri</i> pv. citri | A  | <i>C. reticulata</i>                           | South Korea          | + | + | + | + | + | +(28.48) | +(26.1)  | +(31.26) |
| LB237                 | <i>X. citri</i> pv. citri | A  | <i>C. reticulata</i>                           | South Korea          | + | + | + | + | + | +(33.05) | +(30.21) | +(29.79) |
| JJ053-8               | <i>X. citri</i> pv. citri | A  | <i>C. x jambhiri</i>                           | Taiwan               | + | + | + | + | + | +(29.67) | +(27.47) | +(26.38) |
| JK144-2               | <i>X. citri</i> pv. citri | A  | <i>C. hystrix</i>                              | Thailand             | + | + | + | + | + | +(31.12) | +(31.47) | +(29.63) |
| JJ020-6               | <i>X. citri</i> pv. citri | A  | <i>Citrus</i> sp.                              | Thursday Is.         | + | + | + | + | + | +(29.4)  | +(29.94) | +(23.28) |
| NCPPB 3832            | <i>X. citri</i> pv. citri | A  | <i>C. x sinensis</i>                           | UK<br>(interception) | + | + | + | + | + | +(29.09) | +(27.4)  | +(27.72) |
| JJ162                 | <i>X. citri</i> pv. citri | A  | <i>C. x paradisi</i>                           | Uruguay              | + | + | + | + | + | +(32.70) | +(30.77) | +(29.56) |
| JJ238-29              | <i>X. citri</i> pv. citri | A  | <i>C. x sinensis</i>                           | Florida, USA         | + | + | + | + | + | +(31.32) | +(31.58) | +(33.09) |
| JJ238-34              | <i>X. citri</i> pv. citri | A  | <i>C. x paradisi</i>                           | Florida, USA         | + | + | + | + | + | +(31.81) | +(27.00) | +(27.56) |
| LMG 9322 <sup>T</sup> | <i>X. citri</i> pv. citri | A  | <i>C. x aurantiifolia</i>                      | Florida, USA         | + | + | + | + | + | +(29.61) | +(30.43) | +(29.68) |
| LC002-1               | <i>X. citri</i> pv. citri | A  | <i>C. maxima</i>                               | Viet Nam             | + | + | + | + | + | +(28.65) | +(27.05) | +(26.55) |
| JK004-9               | <i>X. citri</i> pv. citri | A  | <i>Citrus</i> sp.                              | Yemen                | + | + | + | + | + | +(33.34) | +(29.46) | +(29.27) |
| LD071A                | <i>X. citri</i> pv. citri | A* | <i>Citrus</i> sp.                              | Cambodia             | + | + | + | + | + | +(27.70) | +(29.15) | +(32.00) |
| LL067-5               | <i>X. citri</i> pv. citri | A* | <i>Citrus</i> sp.                              | Ethiopia             | + | + | + | + | + | +(27.93) | +(29.60) | +(33.04) |
| CFBP 2858             | <i>X. citri</i> pv. citri | A* | <i>C. x aurantiifolia</i>                      | Fiji                 | + | + | + | + | + | +(26.61) | +(30.73) | +(31.08) |
| NCPPB 3615            | <i>X. citri</i> pv. citri | A* | <i>C. x aurantiifolia</i>                      | India                | + | + | + | + | + | +(25.12) | +(26.51) | +(28.73) |
| JM047-2               | <i>X. citri</i> pv. citri | A* | <i>C. x aurantiifolia</i>                      | Iran                 | + | + | + | + | + | +(28.03) | +(29.62) | +(32.97) |
| JS551                 | <i>X. citri</i> pv. citri | A* | <i>Citrus</i> sp.                              | Iran                 | + | + | + | + | + | +(26.70) | +(27.18) | +(31.28) |
| R-5228                | <i>X. citri</i> pv. citri | A* | <i>Citrus</i> sp.                              | Iran                 | + | + | + | + | + | +(29.16) | +(21.59) | +(24.28) |
| CFBP 2911             | <i>X. citri</i> pv. citri | A* | <i>Citrus</i> sp.                              | Pakistan             | + | + | + | + | + | +(30.9)  | +(32.72) | +(33.1)  |

|            |                           |                |                           |                      |   |   |   |   |   |          |          |          |
|------------|---------------------------|----------------|---------------------------|----------------------|---|---|---|---|---|----------|----------|----------|
| JK002-17   | <i>X. citri</i> pv. citri | A*             | <i>C. x aurantiifolia</i> | Saudi Arabia         | + | + | + | + | + | +(29.78) | +(31.15) | +(32.00) |
| JK143-10   | <i>X. citri</i> pv. citri | A*             | <i>C. x aurantiifolia</i> | Thailand             | + | + | + | + | + | +(25.90) | +(27.72) | +(31.55) |
| NCPPB 3799 | <i>X. citri</i> pv. citri | A*             | <i>C. x aurantiifolia</i> | UK<br>(interception) | + | + | + | + | + | +(27.82) | +(29.38) | +(32.01) |
| LG115      | <i>X. citri</i> pv. citri | A <sup>w</sup> | <i>C. x aurantiifolia</i> | India                | + | + | + | + | + | +(28.90) | +(30.86) | +(31.24) |
| LG116      | <i>X. citri</i> pv. citri | A <sup>w</sup> | <i>C. x limon</i>         | India                | + | + | + | + | + | +(28.52) | +(29.74) | +(33.57) |
| JF090-8    | <i>X. citri</i> pv. citri | A <sup>w</sup> | <i>C. x aurantiifolia</i> | Oman                 | + | + | + | + | + | +(29.82) | +(32.03) | +(32.25) |
| LB305      | <i>X. citri</i> pv. citri | A <sup>w</sup> | <i>Citrus</i> sp.         | Florida, USA         | + | + | + | + | + | +(27.27) | +(29.07) | +(32.78) |
| LB302      | <i>X. citri</i> pv. citri | A <sup>w</sup> | <i>Citrus</i> sp.         | Florida, USA         | + | + | + | + | + | +(30.55) | +(29.13) | +(32.04) |

#### Other Xanthomonas species or pathovars pathogenic to citrus

|                         |                                          |   |                                                   |              |   |   |   |   |   |   |          |          |
|-------------------------|------------------------------------------|---|---------------------------------------------------|--------------|---|---|---|---|---|---|----------|----------|
| CFBP 2904               | <i>X. citri</i> pv. aurantifolii         | B | <i>C. x limon</i>                                 | Argentina    | + | + | - | - | - | - | -        | +(24.5)  |
| JJ159                   | <i>X. citri</i> pv. aurantifolii         | B | <i>C. x limon</i>                                 | Argentina    | + | + | - | - | - | - | -        | +(27.71) |
| JJ161                   | <i>X. citri</i> pv. aurantifolii         | B | <i>C. x limon</i>                                 | Uruguay      | + | + | - | - | - | - | -        | +(28.33) |
| CFBP 2866               | <i>X. citri</i> pv. aurantifolii         | C | <i>C. x aurantiifolia</i>                         | Brazil       | + | + | - | - | - | - | -        | +(31.57) |
| CFBP 2905               | <i>X. citri</i> pv. aurantifolii         | C | <i>C. x aurantiifolia</i>                         | Brazil       | + | + | - | - | - | - | -        | +(29.96) |
| NCPPB 1759              | <i>X. citri</i> pv. bilvae               |   | <i>Feronia elephantacum</i>                       | India        | + | + | + | + | - | - | +(20.73) | +(17.67) |
| NCPPB 3213              | <i>X. citri</i> pv. bilvae               |   | <i>Aegle marmelos</i>                             | India        | - | - | + | + | - | - | -        | -        |
| CFBP 3138 <sup>PT</sup> | <i>X. euvesicatoria</i> pv. citrumelonis |   | <i>Poncirus trifoliata</i> X <i>C. x paradisi</i> | Florida, USA | - | - | - | - | - | - | -        | -        |
| JJ 238-28               | <i>X. euvesicatoria</i> pv. citrumelonis |   | <i>Poncirus trifoliata</i> X <i>C. x paradisi</i> | Florida, USA | - | - | - | - | - | - | -        | -        |

#### X. citri pathovars not pathogenic to citrus

|                        |                                 |  |                          |       |   |   |   |   |   |          |       |          |
|------------------------|---------------------------------|--|--------------------------|-------|---|---|---|---|---|----------|-------|----------|
| LMG 548 <sup>PT</sup>  | <i>X. citri</i> pv. bauhiniae   |  | <i>Bauhinia racemosa</i> | India | + | + | - | + | - | -        | -     | +(22.93) |
| LMG 558 <sup>PT</sup>  | <i>X. citri</i> pv. cajani      |  | <i>Cajanus cajan</i>     | India | + | + | + | + | - | +(23.46) | -     | +(22.93) |
| LMG 9045 <sup>PT</sup> | <i>X. citri</i> pv. clitoriae   |  | <i>Clitoria biflora</i>  | India | - | - | + | + | - | -        | -     | -        |
| LMG 712 <sup>PT</sup>  | <i>X. citri</i> pv. glycines    |  | <i>Glycine max</i>       | Sudan | + | + | - | + | - | -        | -     | +(24.28) |
| LMG 760                | <i>X. citri</i> pv. malvacearum |  | <i>Gossypium</i> sp.     | India | + | + | - | + | - | -        | 23.07 | +(18.11) |
| LMG 761 <sup>PT</sup>  | <i>X. citri</i> pv. malvacearum |  | <i>Gossypium</i> sp.     | Sudan | + | + | - | + | - | -        | -     | +(21.00) |

|                                                      |                                          |                                                      |              |   |   |   |   |   |       |          |  |
|------------------------------------------------------|------------------------------------------|------------------------------------------------------|--------------|---|---|---|---|---|-------|----------|--|
| LH408                                                | <i>X. citri</i><br>pv. mangiferaeindicae | <i>Mangifera indica</i>                              | India        | + | + | - | + | - | -     | +(21.59) |  |
| <b>Other <i>Xanthomonas</i> species</b>              |                                          |                                                      |              |   |   |   |   |   |       |          |  |
| CFBP 2528 <sup>T</sup>                               | <i>X. arboricola</i><br>pv. juglandis    | <i>Juglans regia</i>                                 | New Zealand  | - | - | - | - | - | -     | -        |  |
| LMG 7303 <sup>PT</sup>                               | <i>X. axonopodis</i><br>pv. begoniae     | <i>Begonia<br/>tuberhybrida</i>                      | New Zealand  | - | - | - | - | - | -     | -        |  |
| LMG 844 <sup>PT</sup>                                | <i>X. axonopodis</i><br>pv. phyllanthi   | <i>Phyllanthus niruri</i>                            | Sudan        | + | + | - | - | - | 22.58 | +(21.48) |  |
| LMG 568 <sup>T</sup>                                 | <i>X. campestris</i><br>pv. campestris   | <i>Brassica oleracea</i>                             | UK           | - | - | - | - | - | -     | -        |  |
| CFBP 6107                                            | <i>X. euvesicatoria</i> pv. allii        | <i>Allium fistulosum</i>                             | Japan        | - | - | - | - | - | -     | -        |  |
| CFBP 6775                                            | <i>X. fragariae</i>                      | <i>Fragaria vesca</i>                                | Italy        | - | - | - | - | - | -     | -        |  |
| CFBP 2532 <sup>T</sup>                               | <i>X. oryzae</i> pv. oryzae              | <i>Oryza sativa</i>                                  | India        | - | - | - | - | - | -     | -        |  |
| LMG 695 <sup>PT</sup>                                | <i>X. phaseoli</i><br>pv. dieffenbachiae | <i>Anthurium</i> sp.                                 | Brésil       | - | - | - | - | - | -     | -        |  |
| CFBP 4641 <sup>T</sup>                               | <i>X. sacchari</i>                       | <i>Saccharum<br/>officinarum</i>                     | Guadeloupe   | - | - | - | - | - | -     | -        |  |
| LMG 892 <sup>PT</sup>                                | <i>X. translucens</i><br>pv. undulosa    | <i>Triticum turgidum</i>                             | Canada       | - | - | - | - | - | -     | -        |  |
| LMG 911 <sup>T</sup>                                 | <i>X. vesicatoria</i>                    | <i>Lycopersicon<br/>esculentum</i>                   | New Zealand  | - | - | - | - | - | -     | -        |  |
| <b>Saprophytic xanthomonads isolated from citrus</b> |                                          |                                                      |              |   |   |   |   |   |       |          |  |
| R-4918                                               | <i>X. hortorum</i>                       | <i>Citrus</i> sp.                                    | Iran         | - | - | - | - | - | -     | -        |  |
| R-5430                                               | <i>X. hortorum</i>                       | <i>Citrus</i> sp.                                    | Iran         | - | - | - | - | - | -     | -        |  |
| LMG 8989                                             | <i>Xanthomonas</i> sp.                   | <i>Citrus</i> sp.                                    | Florida, USA | - | - | - | - | - | -     | -        |  |
| LMG 8993                                             | <i>X. arboricola</i>                     | <i>Citrus</i> sp.                                    | Florida, USA | - | - | - | - | - | -     | -        |  |
| LMG 8998                                             | <i>X. arboricola</i>                     | <i>Citrus</i> sp.                                    | Florida, USA | - | - | - | - | - | -     | -        |  |
| LMG 9002                                             | <i>Xanthomonas</i> sp.                   | <i>Citrus</i> sp.                                    | Florida, USA | - | - | - | - | - | -     | -        |  |
| JK130-2                                              | <i>Xanthomonas</i> sp.                   | <i>Poncirus trifoliata</i> X<br><i>C. x paradisi</i> | Argentina    | - | - | - | - | - | -     | -        |  |
| JK130-3                                              | <i>X. arboricola</i>                     | <i>C. x sinensis</i>                                 | Argentina    | - | - | - | - | - | -     | -        |  |
| JK130-4                                              | <i>X. arboricola</i>                     | <i>C. x paradisi</i>                                 | Argentina    | - | - | - | - | - | -     | -        |  |
| JK130-5                                              | <i>Xanthomonas</i> sp.                   | <i>C. x limon</i>                                    | Argentina    | - | - | - | - | - | -     | -        |  |

|          |                        |                      |           |   |   |   |   |   |   |   |   |
|----------|------------------------|----------------------|-----------|---|---|---|---|---|---|---|---|
| JK130-7  | <i>Xanthomonas</i> sp. | <i>C. x sinensis</i> | Argentina | - | - | - | - | - | - | - | - |
| JK130-8  | <i>Xanthomonas</i> sp. | <i>C. x paradisi</i> | Argentina | - | - | - | - | - | - | - | - |
| JK130-10 | <i>Xanthomonas</i> sp. | <i>C. x limon</i>    | Argentina | - | - | - | - | - | - | - | - |
| JK130-13 | <i>Xanthomonas</i> sp. | <i>C. x limon</i>    | Argentina | - | - | - | - | - | - | - | - |
| JK130-15 | <i>Xanthomonas</i> sp. | <i>C. x limon</i>    | Argentina | - | - | - | - | - | - | - | - |

<sup>PT</sup> pathotype strain; <sup>T</sup> type strain.

The strains common to Tables S6 and S7 are highlighted in grey.

**Table S5. Threshold of detection of PCR and real-time qPCR assays targeting CBC strain, in different citrus matrices.**

| Strain<br>(pathotype)<br>3x10 <sup>2</sup> -3x10 <sup>7</sup><br>CFU/ml | Citrus       | Matrix             | Conventional PCR (template qty)                    |                                             |                                 |                                          |                                       | Real-time qPCR<br>(template qty)         |                                                   |                                              |
|-------------------------------------------------------------------------|--------------|--------------------|----------------------------------------------------|---------------------------------------------|---------------------------------|------------------------------------------|---------------------------------------|------------------------------------------|---------------------------------------------------|----------------------------------------------|
|                                                                         |              |                    | Jpth1/2<br>Cubero et<br>Graham,<br>2002<br>(2.5µl) | VM3-4<br>Mavrodieva<br>et al. 2004<br>(2µl) | XAC F/R<br>Park (2006)<br>(5µl) | XCF/R<br>Miyoshi et<br>al.,1998<br>(5µl) | XAC1051<br>F/R<br>This study<br>(2µl) | XAC1051-<br>2qPCR<br>This study<br>(2µl) | J-Taqqth<br>Cubero et<br>Graham,<br>2005<br>(5µl) | VM3-4<br>Mavrodieva<br>et al. 2004)<br>(2µl) |
| (A)                                                                     | Sweet orange | fruit              | 3 x10 <sup>4</sup> <sup>a</sup>                    | 3 x10 <sup>4</sup>                          | 3 x10 <sup>5</sup>              | 3 x10 <sup>3</sup>                       | 3 x10 <sup>3</sup>                    | 3 x10 <sup>3</sup>                       | 3 x10 <sup>3</sup>                                | 3 x10 <sup>3</sup>                           |
|                                                                         |              | leaf               | 3 x10 <sup>5</sup>                                 | 3 x10 <sup>4</sup>                          | 3 x10 <sup>5</sup>              | 3 x10 <sup>3</sup>                       | 3 x10 <sup>3</sup>                    | 3 x10 <sup>3</sup>                       | 3 x10 <sup>3</sup>                                | 3 x10 <sup>3</sup>                           |
|                                                                         | Lemon        | fruit              | 3 x10 <sup>5</sup>                                 | 3 x10 <sup>4</sup>                          | 3 x10 <sup>4</sup>              | 3 x10 <sup>3</sup>                       | 3 x10 <sup>3</sup>                    | 3 x10 <sup>3</sup>                       | 3 x10 <sup>3</sup>                                | 3 x10 <sup>3</sup>                           |
|                                                                         |              | leaf               | 3 x10 <sup>5</sup>                                 | 3 x10 <sup>4</sup>                          | 3 x10 <sup>5</sup>              | 3 x10 <sup>3</sup>                       | 3 x10 <sup>3</sup>                    | 3 x10 <sup>3</sup>                       | 3 x10 <sup>3</sup>                                | 3 x10 <sup>2</sup>                           |
|                                                                         | Tahiti       | fruit              | 3 x10 <sup>5</sup>                                 | 3 x10 <sup>5</sup>                          | 3 x10 <sup>5</sup>              | 3 x10 <sup>4</sup>                       | 3 x10 <sup>4</sup>                    | 3 x10 <sup>3</sup>                       | 3 x10 <sup>3</sup>                                | 3 x10 <sup>3</sup>                           |
|                                                                         | Lime         | leaf               | 3 x10 <sup>5</sup>                                 | 3 x10 <sup>4</sup>                          | 3 x10 <sup>5</sup>              | 3 x10 <sup>4</sup>                       | 3 x10 <sup>3</sup>                    | 3 x10 <sup>3</sup>                       | 3 x10 <sup>3</sup>                                | 3 x10 <sup>3</sup>                           |
|                                                                         | Grapefruit   | fruit              | -                                                  | 3 x10 <sup>4</sup>                          | 3 x10 <sup>4</sup>              | 3 x10 <sup>3</sup>                       | 3 x10 <sup>3</sup>                    | 3 x10 <sup>3</sup>                       | 3 x10 <sup>3</sup>                                | 3 x10 <sup>3</sup>                           |
|                                                                         |              | leaf               | -                                                  | 3 x10 <sup>4</sup>                          | 3 x10 <sup>4</sup>              | 3 x10 <sup>3</sup>                       | 3 x10 <sup>3</sup>                    | 3 x10 <sup>3</sup>                       | 3 x10 <sup>3</sup>                                | 3 x10 <sup>3</sup>                           |
|                                                                         | Clementine   | fruit              | 3 x10 <sup>5</sup>                                 | 3 x10 <sup>5</sup>                          | 3x10 <sup>5</sup>               | 3x10 <sup>4</sup>                        | 3 x10 <sup>3</sup>                    | 3 x10 <sup>2</sup>                       | 3 x10 <sup>3</sup>                                | 3 x10 <sup>2</sup>                           |
|                                                                         |              | leaf               | 3 x10 <sup>5</sup>                                 | 3x10 <sup>4</sup>                           | 3 x10 <sup>4</sup>              | 3x10 <sup>3</sup>                        | 3 x10 <sup>3</sup>                    | 3 x10 <sup>3</sup>                       | 3 x10 <sup>3</sup>                                | 3 x10 <sup>3</sup>                           |
| Makrut lime                                                             | fruit        | 3 x10 <sup>5</sup> | 3 x10 <sup>4</sup>                                 | 3 x10 <sup>4</sup>                          | 3x10 <sup>3</sup>               | 3 x10 <sup>3</sup>                       | 3 x10 <sup>3</sup>                    | 3 x10 <sup>3</sup>                       | 3 x10 <sup>3</sup>                                |                                              |
|                                                                         | leaf         | 3x10 <sup>5</sup>  | 3 x10 <sup>4</sup>                                 | 3 x10 <sup>4</sup>                          | 3x10 <sup>3</sup>               | 3 x10 <sup>3</sup>                       | 3 x10 <sup>3</sup>                    | 3 x10 <sup>3</sup>                       | 3 x10 <sup>3</sup>                                |                                              |
| LH1-1 (A)                                                               | Mexican lime | fruit              | 3 x10 <sup>6</sup>                                 | 3 x10 <sup>6</sup>                          | 3 x10 <sup>6</sup>              | 3x10 <sup>4</sup>                        | 3 x10 <sup>4</sup>                    | 3 x10 <sup>3</sup>                       | 3 x10 <sup>3</sup>                                | 3 x10 <sup>4</sup>                           |
|                                                                         |              | leaf               | 3 x10 <sup>7</sup>                                 | 3 x10 <sup>5</sup>                          | 3 x10 <sup>4</sup>              | 3 x10 <sup>3</sup>                       | 3 x10 <sup>3</sup>                    | 3 x10 <sup>3</sup>                       | 3 x10 <sup>3</sup>                                | 3 x10 <sup>3</sup>                           |
| JJ238-29 (A)                                                            | fruit        | fruit              | 3 x10 <sup>6</sup>                                 | 3 x10 <sup>6</sup>                          | 3 x10 <sup>6</sup>              | 3 x10 <sup>5</sup>                       | 3 x10 <sup>4</sup>                    | 3 x10 <sup>4</sup>                       | 3 x10 <sup>3</sup>                                | 3 x10 <sup>4</sup>                           |
|                                                                         |              | leaf               | 3 x10 <sup>6</sup>                                 | 3 x10 <sup>4</sup>                          | 3 x10 <sup>6</sup>              | 3 x10 <sup>4</sup>                       | 3 x10 <sup>4</sup>                    | 3 x10 <sup>3</sup>                       | 3 x10 <sup>3</sup>                                | 3 x10 <sup>3</sup>                           |
| CFBP2911 (A*)                                                           | fruit        | fruit              | 3 x10 <sup>6</sup>                                 | 3 x10 <sup>6</sup>                          | 3 x10 <sup>5</sup>              | 3 x10 <sup>3</sup>                       | 3 x10 <sup>3</sup>                    | 3 x10 <sup>2</sup>                       | 3 x10 <sup>4</sup>                                | 3 x10 <sup>5</sup>                           |
|                                                                         |              | leaf               | 3 x10 <sup>7</sup>                                 | 3 x10 <sup>6</sup>                          | 3x10 <sup>5</sup>               | 3 x10 <sup>4</sup>                       | 3 x10 <sup>4</sup>                    | 3 x10 <sup>3</sup>                       | 3 x10 <sup>4</sup>                                | 3 x10 <sup>4</sup>                           |
| LG115 (A <sup>w</sup> )                                                 | fruit        | fruit              | 3 x10 <sup>5</sup>                                 | 3 x10 <sup>4</sup>                          | 3x10 <sup>4</sup>               | 3 x10 <sup>3</sup>                       | 3 x10 <sup>3</sup>                    | 3 x10 <sup>3</sup>                       | 3 x10 <sup>3</sup>                                | 3 x10 <sup>3</sup>                           |
|                                                                         |              | leaf               | 3 x10 <sup>5</sup>                                 | 3 x10 <sup>4</sup>                          | 3x10 <sup>4</sup>               | 3 x10 <sup>3</sup>                       | 3 x10 <sup>3</sup>                    | 3 x10 <sup>3</sup>                       | 3 x10 <sup>3</sup>                                | 3 x10 <sup>3</sup>                           |
| CFBP2902 (B)                                                            | fruit        | fruit              | 3 x10 <sup>7</sup>                                 | 3 x10 <sup>6</sup>                          | -                               | -                                        | -                                     | -                                        | -                                                 | 3 x10 <sup>4</sup>                           |
|                                                                         |              | leaf               | 3 x10 <sup>7</sup>                                 | 3 x10 <sup>6</sup>                          | -                               | -                                        | -                                     | -                                        | -                                                 | 3 x10 <sup>5</sup>                           |
| CFBP2866 (C)                                                            | fruit        | fruit              | 3 x10 <sup>6</sup>                                 | 3 x10 <sup>4</sup>                          | -                               | -                                        | -                                     | -                                        | -                                                 | 3 x10 <sup>4</sup>                           |
|                                                                         |              | leaf               | 3 x10 <sup>6</sup>                                 | 3 x10 <sup>6</sup>                          | -                               | -                                        | -                                     | -                                        | -                                                 | 3 x10 <sup>4</sup>                           |
| Cut-off <sup>b</sup> values                                             |              |                    |                                                    |                                             |                                 |                                          | 36.5                                  | 35.5                                     | 33.5                                              |                                              |

<sup>a</sup> Threshold of detection (in CFU ml<sup>-1</sup>): correct amplification for both duplicates of PCR and mean Ct values below the cut-off value estimated by ROC analyze for each qPCR assay on LC480.

<sup>b</sup> Cut-off values determined for each qPCR assay on LC480 using the ROC method.



**Table S6. Strains of *Xanthomonas citri* pv. *citri* used for the determination of the specificity of XAC1051-2qPCR protocol.**

| Strain      | Pathotype | Host                       | Origin       | qPCR reponse (Ct) |
|-------------|-----------|----------------------------|--------------|-------------------|
| JW160-1     | A         | <i>C. x aurantiifolia</i>  | Bangladesh   | +(29.24)          |
| LG097       | A         | <i>C. x limon</i>          | Bangladesh   | +(29.62)          |
| LG099       | A         | <i>C. x aurantiifolia</i>  | Bangladesh   | +(31.58)          |
| LG101       | A         | <i>C. x aurantiifolia</i>  | Bangladesh   | +(31.25)          |
| LG102       | A         | <i>Citrus</i> sp.          | Bangladesh   | +(30.36)          |
| LG103       | A         | <i>C. x aurantiifolia</i>  | Bangladesh   | +(31.14)          |
| LG104       | A         | <i>C. x aurantiifolia</i>  | Bangladesh   | +(30.19)          |
| LG105       | A         | <i>C. x aurantiifolia</i>  | Bangladesh   | +(30.30)          |
| LG106       | A         | <i>C. x aurantiifolia</i>  | Bangladesh   | +(30.24)          |
| LG107       | A         | <i>C. x aurantiifolia</i>  | Bangladesh   | +(29.31)          |
| LG108       | A         | <i>C. x aurantiifolia</i>  | Bangladesh   | +(29.29)          |
| LG109       | A         | <i>C. x aurantiifolia</i>  | Bangladesh   | +(31.10)          |
| LG110       | A         | <i>C. x aurantiifolia</i>  | Bangladesh   | +(30.83)          |
| LG111       | A         | <i>C. x aurantiifolia</i>  | Bangladesh   | +(29.91)          |
| LG112       | A         | <i>C. x aurantiifolia</i>  | Bangladesh   | +(30.58)          |
| LG113       | A         | <i>C. x aurantiifolia</i>  | Bangladesh   | +(31.73)          |
| LG114       | A         | <i>C. x aurantiifolia</i>  | Bangladesh   | +(31.48)          |
| LG117       | A         | <i>C. x aurantiifolia</i>  | Bangladesh   | +(31.16)          |
| IAPAR 306   | A         | <i>C. x sinensis</i>       | Brazil       | +(28.43)          |
| IAPAR 12853 | A         | <i>Citrus</i> sp.          | Brazil       | +(29.14)          |
| IBSBF 256   | A         | <i>C. reticulata</i>       | Brazil       | +(28.29)          |
| IBSBF 1350  | A         | <i>C. x aurantiifolia</i>  | Brazil       | +(28.98)          |
| LA081-8     | A         | <i>C. x sinensis</i>       | Brazil       | +(28.76)          |
| LG130       | A         | <i>C. x aurantiifolia</i>  | Brazil       | +(28.46)          |
| LD071B      | A         | <i>Citrus</i> sp.          | Cambodia     | +(28.71)          |
| JK004-1     | A         | <i>Citrus</i> sp.          | China        | +(28.79)          |
| CFBP 1209   | A         | <i>C. maxima</i>           | Hong Kong    | +(29.46)          |
| CFBP 2852   | A         | <i>Citrus</i> sp.          | India        | +(29.05)          |
| NCPPB 211   | A         | <i>Citrus</i> sp.          | India        | +(30.21)          |
| NCPPB 3562  | A         | <i>C. x limon</i>          | India        | +(29.28)          |
| NCPPB 3610  | A         | <i>Poncirus trifoliata</i> | India        | +(28.73)          |
| NCPPB 3612  | A         | <i>C. x aurantiifolia</i>  | India        | +(30.02)          |
| LD107-2     | A         | <i>C. maxima</i>           | Indonesia    | +(28.65)          |
| CFBP 2855   | A         | <i>Citrus</i> sp.          | Japan        | +(28.86)          |
| CFBP 2900   | A         | <i>Citrus</i> sp.          | Japon        | +(28.56)          |
| JK146-4     | A         | <i>P. trifoliata</i>       | Malaysia     | +(29.17)          |
| JJ238-10    | A         | <i>C. x aurantiifolia</i>  | Maldives Is. | +(28.42)          |

|                         |    |                                                |              |          |
|-------------------------|----|------------------------------------------------|--------------|----------|
| LC080-2                 | A  | <i>C. reticulata</i> X<br><i>C. x sinensis</i> | Mali         | +(28.73) |
| LD007-1                 | A  | <i>C. x aurantiifolia</i>                      | Mali         | +(28.94) |
| LD007-2                 | A  | <i>C. x aurantiifolia</i>                      | Mali         | +(28.82) |
| LE117-1                 | A  | <i>C. x aurantiifolia</i>                      | Mali         | +(28.77) |
| LE116-1                 | A  | <i>C. x aurantiifolia</i>                      | Mali         | +(28.54) |
| CFBP 2525 <sup>PT</sup> | A  | <i>C. x limon</i>                              | New Zealand  | +(28.78) |
| JJ238-16                | A  | <i>C. x sinensis</i>                           | Pakistan     | +(31.22) |
| LH001-3                 | A  | <i>Citrus</i> sp.                              | Pakistan     | +(29.22) |
| JJ238-13                | A  | <i>Citrus</i> sp.                              | Philippines  | +(29.28) |
| JK148-10                | A  | <i>C. x madurensis</i>                         | Philippines  | +(29.75) |
| C40                     | A  | <i>C. x sinensis</i>                           | Reunion Is.  | +(28.62) |
| JJ010-1                 | A  | <i>C. x aurantiifolia</i>                      | Rodrigues    | +(27.68) |
| LH037-2                 | A  | <i>C. x paradisi</i>                           | Senegal      | +(29.07) |
| LH044                   | A  | <i>C. x aurantiifolia</i>                      | Senegal      | +(28.96) |
| LH041-1                 | A  | <i>C. maxima</i>                               | Senegal      | +(28.58) |
| LB100-1                 | A  | <i>C. sinensis</i> X <i>P. trifoliata</i>      | Seychelles   | +(29.27) |
| LB232                   | A  | <i>C. x limon</i>                              | South Korea  | +(28.82) |
| CFBP 2548               | A  | <i>Citrus</i> sp.                              | Taiwan       | +(28.71) |
| JK144-4                 | A  | <i>C. reticulata</i>                           | Thailand     | +(28.97) |
| LMG 9322 <sup>T</sup>   | A  | <i>C. x aurantiifolia</i>                      | Florida, USA | +(29.24) |
| JN551-1                 | A  | <i>C. x aurantiifolia</i>                      | Vietnam      | +(29.55) |
| JK004-9                 | A  | <i>Citrus</i> sp.                              | Yemen        | +(31.82) |
| LD071A                  | A* | <i>Citrus</i> sp.                              | Cambodia     | +(30.21) |
| LE003-1                 | A* | <i>C. x aurantiifolia</i>                      | Ethiopia     | +(30.87) |
| LE020-1                 | A* | <i>C. x aurantiifolia</i>                      | Ethiopia     | +(31.05) |
| LE032-1                 | A* | <i>C. x aurantiifolia</i>                      | Ethiopia     | +(30.17) |
| LE065-1                 | A* | <i>C. x aurantiifolia</i>                      | Ethiopia     | +(30.39) |
| NCPPB 3607              | A* | <i>C. x aurantiifolia</i>                      | India        | +(29.52) |
| NCPPB 3608              | A* | <i>C. x aurantiifolia</i>                      | India        | +(29.59) |
| NCPPB 3615              | A* | <i>C. x aurantiifolia</i>                      | India        | +(30.38) |
| LMG 696                 | A* | <i>Duranta repens</i> ? <sup>†</sup>           | India        | +(29.74) |
| JS552                   | A* | <i>Citrus</i> sp.                              | Iran         | +(29.72) |
| JS555                   | A* | <i>Citrus</i> sp.                              | Iran         | +(29.34) |
| JS581                   | A* | <i>Citrus</i> sp.                              | Iran         | +(30.11) |
| JS582                   | A* | <i>Citrus</i> sp.                              | Iran         | +(30.28) |
| JS584                   | A* | <i>Citrus</i> sp.                              | Iran         | +(30.41) |
| LH580                   | A* | <i>C. x aurantiifolia</i>                      | Iran         | +(28.70) |
| LH620                   | A* | <i>C. x aurantiifolia</i>                      | Iran         | +(29.66) |
| LH624                   | A* | <i>C. x aurantiifolia</i>                      | Iran         | +(29.06) |
| LH627-2                 | A* | <i>C. x aurantiifolia</i>                      | Iran         | +(30.78) |
| LH595                   | A* | <i>C. x aurantiifolia</i>                      | Iran         | +(31.62) |
| LH605-1                 | A* | <i>C. x aurantiifolia</i>                      | Iran         | +(28.32) |

|           |                |                           |              |          |
|-----------|----------------|---------------------------|--------------|----------|
| LJ235     | A*             | <i>Citrus</i> sp.         | Iran         | +(31.90) |
| LJ249     | A*             | <i>C. x aurantiifolia</i> | Iran         | +(31.29) |
| LJ251     | A*             | <i>Citrus</i> sp.         | Iran         | +(31.39) |
| JF090-2   | A*             | <i>C. x aurantiifolia</i> | Oman         | +(31.74) |
| JF090-3   | A*             | <i>C. x aurantiifolia</i> | Oman         | +(29.28) |
| CFBP 2911 | A*             | <i>Citrus</i> sp.         | Pakistan     | +(28.93) |
| JK002-10  | A*             | <i>C. x aurantiifolia</i> | Saudi Arabia | +(29.74) |
| JK002-14  | A*             | <i>C. x aurantiifolia</i> | Saudi Arabia | +(29.02) |
| JK048     | A*             | <i>C. x aurantiifolia</i> | Saudi Arabia | +(29.86) |
| JK051     | A*             | <i>C. x aurantiifolia</i> | Saudi Arabia | +(29.13) |
| JM035-2   | A*             | <i>C. x aurantiifolia</i> | Saudi Arabia | +(29.92) |
| JJ238-24  | A*             | <i>C. x aurantiifolia</i> | Thailand     | +(29.40) |
| JK143-11  | A*             | <i>C. maxima</i>          | Thailand     | +(29.57) |
| JK143-5   | A*             | <i>C. x aurantiifolia</i> | Thailand     | +(29.52) |
| LB302     | A <sup>w</sup> | <i>Citrus</i> sp.         | Florida, USA | +(30.31) |
| LB305     | A <sup>w</sup> | <i>Citrus</i> sp.         | Florida, USA | +(30.11) |
| LG115     | A <sup>w</sup> | <i>C. x aurantiifolia</i> | India        | +(30.28) |
| LG116     | A <sup>w</sup> | <i>C. x limon</i>         | India        | +(29.73) |
| JF090-8   | A <sup>w</sup> | <i>C. x aurantiifolia</i> | Oman         | +(29.08) |

<sup>†</sup> Host species as originally registered; Patané *et al.* (BMC Genomics 20:700) provide evidence that this strain was misidentified;  
<sup>P</sup>T pathotype strain; <sup>T</sup> type strain.

The strains used for comparison of the different PCR and qPCR protocols (Table S4) are highlighted in grey).

**Table S7. Non-target strains used to evaluate the specificity of the XAC1051-2qPCR protocol.**

| Strain                                                                    | Taxon                                    | Host of isolation                                    | Country of origin  | qPCR response (Ct) |
|---------------------------------------------------------------------------|------------------------------------------|------------------------------------------------------|--------------------|--------------------|
| <b>Other <i>Xanthomonas</i> species or pathovars pathogenic to citrus</b> |                                          |                                                      |                    |                    |
| JJ159                                                                     | <i>X. citri</i> pv. aurantifolii (B)     | <i>C. x limon</i>                                    | Argentina          | -                  |
| CFBP 2902                                                                 | <i>X. citri</i> pv. aurantifolii (B)     | <i>C. x limon</i>                                    | Argentina          | -                  |
| CFBP 2903                                                                 | <i>X. citri</i> pv. aurantifolii (B)     | <i>C. x limon</i>                                    | Argentina          | -                  |
| CFBP 2904                                                                 | <i>X. citri</i> pv. aurantifolii (B)     | <i>C. x limon</i>                                    | Argentina          | -                  |
| JJ160                                                                     | <i>X. citri</i> pv. aurantifolii (B)     | <i>Citrus</i> sp.                                    | Uruguay            | -                  |
| JJ161                                                                     | <i>X. citri</i> pv. aurantifolii (B)     | <i>C. x limon</i>                                    | Uruguay            | -                  |
| CFBP 2866                                                                 | <i>X. citri</i> pv. aurantifolii (C)     | <i>C. x aurantifolia</i>                             | Brazil             | -                  |
| CFBP 2905                                                                 | <i>X. citri</i> pv. aurantifolii (C)     | <i>C. x aurantifolia</i>                             | Brazil             | -                  |
| CFBP 2906                                                                 | <i>X. citri</i> pv. aurantifolii (C)     | <i>C. x aurantifolia</i>                             | Brazil             | -                  |
| NCPPB 1759                                                                | <i>X. citri</i> pv. bilvae               | <i>Feroniae elephantacum</i>                         | India              | -                  |
| CFBP 2910                                                                 | <i>X. euvesicatoria</i> pv. citrumelonis | <i>Poncirus trifoliata</i> X<br><i>C. x paradisi</i> | USA                | -                  |
| CFBP 3114                                                                 | <i>X. euvesicatoria</i> pv. citrumelonis | <i>P. trifoliata</i> X<br><i>C. x paradisi</i>       | Florida, USA       | -                  |
| CFBP 3138 <sup>PT</sup>                                                   | <i>X. euvesicatoria</i> pv. citrumelonis | <i>P. trifoliata</i> X<br><i>C. x paradisi</i>       | Florida, USA       | -                  |
| JJ238-20                                                                  | <i>X. euvesicatoria</i> pv. citrumelonis | <i>C. x paradisi</i>                                 | Florida, USA       | -                  |
| JJ238-26                                                                  | <i>X. euvesicatoria</i> pv. citrumelonis | <i>Citrus</i> sp.                                    | Florida, USA       | -                  |
| JJ238-27                                                                  | <i>X. euvesicatoria</i> pv. citrumelonis | <i>P. trifoliata</i> X<br><i>C. x paradisi</i>       | Florida, USA       | -                  |
| JJ238-28                                                                  | <i>X. euvesicatoria</i> pv. citrumelonis | <i>P. trifoliata</i> X<br><i>C. x paradisi</i>       | Florida, USA       | -                  |
| JJ238-31                                                                  | <i>X. euvesicatoria</i> pv. citrumelonis | <i>C. x paradisi</i>                                 | Florida, USA       | -                  |
| JJ238-32                                                                  | <i>X. euvesicatoria</i> pv. citrumelonis | <i>P. trifoliata</i> X<br><i>C. x paradisi</i>       | Florida, USA       | -                  |
| NCPPB 3213                                                                | <i>X. citri</i> pv. bilvae               | <i>Aegle marmelos</i>                                | India              | -                  |
| <b><i>X. citri</i> pathovars not pathogenic to citrus</b>                 |                                          |                                                      |                    |                    |
| LA098                                                                     | <i>X. citri</i> pv. anacardii            | <i>Anacardium occidentale</i>                        | Brazil             | -                  |
| LA100                                                                     | <i>X. citri</i> pv. anacardii            | <i>Anacardium occidentale</i>                        | Brazil             | -                  |
| LMG 532 <sup>PT</sup>                                                     | <i>X. citri</i> pv. aracearum            | <i>Xanthosoma sagittifolium</i>                      | French West Indies | -                  |
| LMG 548 <sup>PT</sup>                                                     | <i>X. citri</i> pv. bauhiniae            | <i>Bauhinia racemosa</i>                             | India              | -                  |
| ICMP 7170                                                                 | <i>X. citri</i> pv. cajani (9.5)         | <i>Cajanus cajan</i>                                 | Fiji               | + (22.93)          |
| ICMP 9000                                                                 | <i>X. citri</i> pv. cajani (9.5)         | <i>Cajanus cajan</i>                                 | Fiji               | + (23.66)          |
| LMG 558 <sup>PT</sup>                                                     | <i>X. citri</i> pv. cajani (9.5)         | <i>Cajanus cajan</i>                                 | India              | + (23.75)          |
| ICMP 1625                                                                 | <i>X. citri</i> pv. cajani (9.6)         | <i>Cajanus cajan</i>                                 | India              | -                  |
| ICMP 5849                                                                 | <i>X. citri</i> pv. cajani (9.6)         | <i>Cajanus cajan</i>                                 | Sudan              | -                  |
| LMG 7387                                                                  | <i>X. citri</i> pv. cajani (9.6)         | <i>Cajanus cajan</i>                                 | Sudan              | -                  |
| LMG 9045 <sup>PT</sup>                                                    | <i>X. citri</i> pv. clitoriae            | <i>Clitoria biflora</i>                              | India              | -                  |
| LMG 9046                                                                  | <i>X. citri</i> pv. desmodiilaxiflori    | <i>Desmodium laxiflorum</i>                          | India              | -                  |
| LMG 7511                                                                  | <i>X. citri</i> pv. fuscans              | <i>Phaseolus</i> sp.                                 | USA                | -                  |
| LMG 712 <sup>PT</sup>                                                     | <i>X. citri</i> pv. glycines             | <i>Glycine max</i>                                   | Sudan              | -                  |

|                                         |                                            |                                 |                |   |
|-----------------------------------------|--------------------------------------------|---------------------------------|----------------|---|
| LMG 7429                                | <i>X. citri</i> pv. malvacearum            | <i>Gossypium</i> sp.            | Uganda         | - |
| LMG 7430                                | <i>X. citri</i> pv. malvacearum            | <i>Gossypium</i> sp.            | Thailand       | - |
| LMG 760                                 | <i>X. citri</i> pv. malvacearum            | <i>Gossypium</i> sp.            | India          | - |
| LMG 761 <sup>PT</sup>                   | <i>X. citri</i> pv. malvacearum            | <i>Gossypium</i> sp.            | Sudan          | - |
| JF030-1                                 | <i>X. citri</i> pv. mangiferaeindicae      | <i>Mangifera indica</i>         | Reunion        | - |
| JN570                                   | <i>X. citri</i> pv. mangiferaeindicae      | <i>Mangifera indica</i>         | Japon          | - |
| LMG 8021 <sup>PT</sup>                  | <i>X. citri</i> pv. rhynchosiae            | <i>Rhynchosia memnonia</i>      | Sudan          | - |
| LMG 867 <sup>PT</sup>                   | <i>X. citri</i> pv. sesbaniae              | <i>Sesbania sesban</i>          | NA             | - |
| LMG 936 <sup>PT</sup>                   | <i>X. citri</i> pv. vignaeradiatae         | <i>Vigna radiata</i>            | Sudan          | - |
| LMG 828                                 | <i>X. citri</i> pv. vignicola              | <i>Vigna unguiculata</i>        | Sudan          | - |
| <b>Other <i>Xanthomonas</i> species</b> |                                            |                                 |                |   |
| LMG 494 <sup>T</sup>                    | <i>X. albilineans</i>                      | <i>Saccharum officinarum</i>    | Fiji           | - |
| LMG 852 <sup>PT</sup>                   | <i>X. arboricola</i> pv. pruni             | <i>Prunus salicina</i>          | New Zealand    | - |
| LMG 539                                 | <i>X. axonopodis</i> pv. axonopodis        | <i>Axonopus scoparius</i>       | Colombia       | - |
| LMG 7303 <sup>PT</sup>                  | <i>X. axonopodis</i> pv. begoniae          | <i>Begonia</i> sp.              | New Zealand    | - |
| LMG 7189                                | <i>X. axonopodis</i> pv. begoniae          | <i>Begonia</i> sp.              | USA            | - |
| LMG 675 <sup>PT</sup>                   | <i>X. axonopodis</i> pv. cassiae           | <i>Cassia tora</i>              | India          | - |
| LMG 691 <sup>PT</sup>                   | <i>X. axonopodis</i> pv. cyamopsidis       | <i>Cyamopsis tetragonolobus</i> | India          | - |
| LMG 693 <sup>PT</sup>                   | <i>X. axonopodis</i> pv. desmodiigangetici | <i>Desmodium gangeticum</i>     | India          | - |
| LMG 811 <sup>PT</sup>                   | <i>X. axonopodis</i> pv. patelii           | <i>Crotalaria juncea</i>        | India          | - |
| LMG 844 <sup>PT</sup>                   | <i>X. axonopodis</i> pv. phyllanthi        | <i>Phyllanthus niruri</i>       | Sudan          | - |
| LMG 849 <sup>PT</sup>                   | <i>X. axonopodis</i> pv. poinsettiicola    | <i>Euphorbia pulcherrima</i>    | India          | - |
| LMG 955 <sup>PT</sup>                   | <i>X. axonopodis</i> pv. tamarindi         | <i>Tamarindus indica</i>        | India          | - |
| LMG 8267                                | <i>X. bromi</i>                            | <i>Bromus willdenowii</i>       | New Zealand    | - |
| LMG 947 <sup>T</sup>                    | <i>X. bromi</i>                            | <i>Bromus carinatus</i>         | France         | - |
| LMG 535 <sup>PT</sup>                   | <i>X. campestris</i> pv. armoraciae        | <i>Iberis</i> sp.               | Tanzania       | - |
| LMG 568 <sup>T</sup>                    | <i>X. campestris</i> pv. campestris        | <i>Brassica oleracea</i>        | United Kingdom | - |
| LMG 5267                                | <i>X. cassavae</i>                         | <i>Manihot esculenta</i>        | Rwanda         | - |
| LMG 673 <sup>T</sup>                    | <i>X. cassavae</i>                         | <i>Manihot esculenta</i>        | Malawi         | - |
| LMG 495                                 | <i>X. euvesicatoria</i> pv. alfalfae       | <i>Medicago sativa</i>          | India          | - |
| LMG 497 <sup>PT</sup>                   | <i>X. euvesicatoria</i> pv. alfalfae       | <i>Medicago sativa</i>          | Sudan          | - |
| CFBP 6107                               | <i>X. euvesicatoria</i> pv. allii          | <i>Allium fistulosum</i>        | Japan          | - |
| CFBP 6366                               | <i>X. euvesicatoria</i> pv. allii          | <i>Allium cepa</i>              | Reunion        | - |
| LMG 8673                                | <i>X. melonis</i>                          | <i>Cucumis melo</i>             | Brazil         | - |
| CFBP 2532 <sup>T</sup>                  | <i>X. oryzae</i> pv. oryzae                | <i>Oryza sativa</i>             | India          | - |
| LMG 797 <sup>PT</sup>                   | <i>X. oryzae</i> pv. oryzicola             | <i>Oryza sativa</i>             | Malaysia       | - |
| LMG 695 <sup>PT</sup>                   | <i>X. phaseoli</i> pv. dieffenbachiae      | <i>Anthurium</i> sp.            | Brazil         | - |
| LMG 8014                                | <i>X. phaseoli</i> pv. phaseoli            | <i>Phaseolus vulgaris</i>       | Romania        | - |
| LMG 7455 <sup>PT</sup>                  | <i>X. phaseoli</i> pv. phaseoli            | <i>Phaseolus vulgaris</i>       | USA            | - |
| CFBP 2603                               | <i>X. phaseoli</i> pv. manihotis           | <i>Manihot esculenta</i>        | Colombia       | - |

|                       |                                          |                              |             |   |
|-----------------------|------------------------------------------|------------------------------|-------------|---|
| LMG 847 <sup>T</sup>  | <i>X. pisi</i>                           | <i>Pisum sativum</i>         | Japan       | - |
| LMG 472               | <i>X. sacchari</i>                       | <i>Saccharum officinarum</i> | Guadeloupe  | - |
| LMG 8684 <sup>T</sup> | <i>X. theicola</i>                       | <i>Camellia sinensis</i>     | Japan       | - |
| LMG 896               | <i>X. vasicola</i> pv. <i>vasculorum</i> | <i>Saccharum officinarum</i> | Puerto Rico | - |

#### Saprophytic xanthomonads isolated from citrus

|          |                        |                                                |              |   |
|----------|------------------------|------------------------------------------------|--------------|---|
| JK130-1  | <i>Xanthomonas</i> sp. | <i>C. x limon</i>                              | Argentina    | - |
| JK130-2  | <i>Xanthomonas</i> sp. | <i>P. trifoliata</i> X<br><i>C. x paradisi</i> | Argentina    | - |
| JK130-3  | <i>X. arboricola</i>   | <i>C. x sinensis</i>                           | Argentina    | - |
| JK130-4  | <i>X. arboricola</i>   | <i>C. x paradisi</i>                           | Argentina    | - |
| JK130-5  | <i>Xanthomonas</i> sp. | <i>C. x limon</i>                              | Argentina    | - |
| JK130-6  | <i>Xanthomonas</i> sp. | <i>C. x limon</i>                              | Argentina    | - |
| JK130-7  | <i>Xanthomonas</i> sp. | <i>C. x sinensis</i>                           | Argentina    | - |
| JK130-8  | <i>Xanthomonas</i> sp. | <i>C. x paradisi</i>                           | Argentina    | - |
| JK130-9  | <i>Xanthomonas</i> sp. | <i>C. x limon</i>                              | Argentina    | - |
| JK130-10 | <i>Xanthomonas</i> sp. | <i>C. x limon</i>                              | Argentina    | - |
| JK130-11 | <i>Xanthomonas</i> sp. | <i>C. x limon</i>                              | Argentina    | - |
| JK130-12 | <i>Xanthomonas</i> sp. | <i>C. x limon</i>                              | Argentina    | - |
| JK130-13 | <i>Xanthomonas</i> sp. | <i>C. x limon</i>                              | Argentina    | - |
| JK130-14 | <i>Xanthomonas</i> sp. | <i>C. x sinensis</i>                           | Argentina    | - |
| JK130-15 | <i>Xanthomonas</i> sp. | <i>C. x limon</i>                              | Argentina    | - |
| R-5430   | <i>X. hortorum</i>     | Citrus sp.                                     | Iran         | - |
| R-5431   | <i>X. hortorum</i>     | Citrus sp.                                     | Iran         | - |
| R-5227   | <i>X. hortorum</i>     | Citrus sp.                                     | Iran         | - |
| R-4917   | <i>X. hortorum</i>     | Citrus sp.                                     | Iran         | - |
| R-4918   | <i>X. hortorum</i>     | Citrus sp.                                     | Iran         | - |
| LMG 8989 | <i>Xanthomonas</i> sp. | Citrus sp.                                     | Florida, USA | - |
| LMG 8992 | <i>Xanthomonas</i> sp. | Citrus sp.                                     | Florida, USA | - |
| LMG 8993 | <i>X. arboricola</i>   | Citrus sp.                                     | Florida, USA | - |
| LMG 8998 | <i>X. arboricola</i>   | Citrus sp.                                     | Florida, USA | - |

<sup>PT</sup> pathotype strain; <sup>T</sup> type strain.

The strains used for comparison of the different PCR and qPCR protocols (Table S4) are highlighted in grey.

**Table S8. Published protocols (sometimes slightly modified for improvement) used for the comparison with the XAC 1051-based conventional and real-time PCR assays developed in the study.**

|                                          | Conventional PCR             |                                  |                              |                               | SyberGreen Real-time PCR                          | Taqman Real-time PCR                              |
|------------------------------------------|------------------------------|----------------------------------|------------------------------|-------------------------------|---------------------------------------------------|---------------------------------------------------|
| <b>Reference publication</b>             | Cubero and Graham<br>2002    | Mavrodiava <i>et al.</i><br>2004 | Park <i>et al.</i><br>2006   | Miyoshi <i>et al.</i><br>1998 | Mavrodiava <i>et al.</i><br>2004                  | Cubero and Graham<br>2005                         |
| <b>Primers</b>                           | Jpth1/2                      | VM3/4                            | XACF/R                       | XCF/R                         | VM3/VM4                                           | J-RTpth3/4                                        |
| <b>Cycler</b>                            | Veriti™ (Applied Biosystems) | Veriti™ (Applied Biosystems)     | Veriti™ (Applied Biosystems) | Veriti™ (Applied Biosystems)  | Light Cycler LC480 (Roche Life Science)           | Light Cycler LC480 (Roche Life Science)           |
| <b>Probe</b>                             | -                            | -                                | -                            | -                             | -                                                 | J-Taqpht2                                         |
| <b>Conv. PCR mixtures</b>                |                              |                                  |                              |                               |                                                   |                                                   |
| Buffer                                   | 1X                           | 1X                               | 1X                           | 1X                            |                                                   |                                                   |
| MgCl <sub>2</sub> (mM)                   | 3                            | 1                                | 3                            | 2                             |                                                   |                                                   |
| dNTPs (mM)                               | 0.2                          | 0.2                              | 0.2                          | 0.2                           |                                                   |                                                   |
| Primer Forward (μM)                      | 0.1                          | 0.2                              | 1                            | 0.2                           |                                                   |                                                   |
| Primer Reverse (μM)                      | 0.1                          | 0.2                              | 1                            | 0.2                           |                                                   |                                                   |
| GoTaq G2 Hot start Polymerase<br>Promega | 1U                           | 1U                               | 1U                           | 1U                            |                                                   |                                                   |
| Template (μl)                            | 2.5                          | 2                                | 5                            | 5                             |                                                   |                                                   |
| Final volume (μl)                        | 25                           | 25                               | 25                           | 25                            |                                                   |                                                   |
| <b>Real-time PCR mixtures</b>            |                              |                                  |                              |                               |                                                   |                                                   |
| GoTaq qPCR master mix<br>Promega         |                              |                                  |                              |                               | 1X                                                |                                                   |
| GoTaq probe qPCR master mix<br>Promega   |                              |                                  |                              |                               | -                                                 | 1X                                                |
| Primer Forward (μM)                      |                              |                                  |                              |                               | 0.5                                               | 0.4                                               |
| Primer Reverse (μM)                      |                              |                                  |                              |                               | 0.5                                               | 0.4                                               |
| TaqMan probe                             |                              |                                  |                              |                               |                                                   | 0.2                                               |
| Template (μl)                            |                              |                                  |                              |                               | 2                                                 | 5                                                 |
| Final volume (μl)                        |                              |                                  |                              |                               | 20                                                | 25                                                |
| <b>Conv. PCR cycles</b>                  |                              |                                  |                              |                               |                                                   |                                                   |
| Initial denaturation                     | 94°C-5 min.                  | 95°C-5 min.                      | 94°C-5 min.                  | 95°C-2.5 min.                 |                                                   |                                                   |
| Cycles number                            | 40x                          | 40x                              | 30x                          | 32x                           |                                                   |                                                   |
| Denaturation                             | [93°C-30s;                   | [95°C-45s;                       | [94°C-15s;                   | [95°C-1 min.;                 |                                                   |                                                   |
| Annealing                                | 58°C-30s;                    | 58°C-45s;                        | 58°C-30s;                    | 65°C-1 min.;                  |                                                   |                                                   |
| Extension                                | 72°C-45s]                    | 72°C-45s]                        | 72°C-30s]                    | 72°C-2 min.]                  |                                                   |                                                   |
| Final extension                          | 72°C-10 min.                 | 72°C-10 min.                     | 72°C-7 min.                  | 72°C-10 min.                  |                                                   |                                                   |
| <b>Real-time PCR cycles</b>              |                              |                                  |                              |                               |                                                   |                                                   |
|                                          |                              |                                  |                              |                               | Same conditions as in the<br>original publication | Same conditions as in<br>the original publication |
